# Supplementary material for: Sesquiterpenes and Monoterpenes from the Leaves and Stems of Illicium simonsii and Their Antibacterial Activity
Source: MDPI journal article supplement (doi:10.3390/molecules27031115), 2022-02-08
Supplement: s1 [file s1]

# Sesquiterpenes and Monoterpenes from the Leaves and Stems of *Illicium simonsii* and their Antibacterial Activity

Huijuan Li <sup>1,2</sup>, Xinghui Song <sup>1,2</sup>, **Huiru Li** <sup>4</sup>, Lifei Zhu <sup>2</sup>, Shengbo Cao <sup>1,\*</sup> and Jifeng Liu <sup>3,\*</sup>

<sup>1</sup> State Key Laboratory of Agricultural Microbiology, Huazhong Agricultural University, Wuhan, Hubei, 430070, P.R. China; sbcao@mail.hzau.edu.cn

<sup>2</sup> School of Veterinary Medicine, Henan University of Animal Husbandry and Economy, Zhengzhou, 450046, P.R. China; lihj2022@126.com

<sup>3</sup> School of Pharmaceutical Science, Zhengzhou University, Ke Xue Da Dao 100, Zhengzhou 450001, P.R. China; liujf2009y@126.com

<sup>4</sup> **Eastern China Conservation Centre for Wild Endangered Plant Resources, Shanghai Chenshan Botanical Garden, Shanghai 201602, P.R. China**

\* Correspondence: sbcao@mail.hzau.edu.cn (S. C.); liujf2009y@126.com (J.L.)

## Supporting information

### Content

|                     |                                                                                                                                               |
|---------------------|-----------------------------------------------------------------------------------------------------------------------------------------------|
| <b>Page S2-S13</b>  | <sup>1</sup> H NMR, <sup>13</sup> C NMR, DEPT-90, DEPT-135, HSQC, HMBC, COSY, ROESY, CD, HRESI, IR (KBr) and UV spectrum of compound <b>1</b> |
| <b>Page S14-S25</b> | <sup>1</sup> H NMR, <sup>13</sup> C NMR, DEPT-90, DEPT-135, HSQC, HMBC, COSY, ROESY, CD, HRESI, IR (KBr) and UV spectrum of compound <b>3</b> |
| <b>Page S26-S36</b> | <sup>1</sup> H NMR, <sup>13</sup> C NMR, DEPT-90, DEPT-135, HSQC, HMBC, COSY, ROESY, CD, HRESI, IR (KBr) and UV spectrum of compound <b>5</b> |
| <b>Page S37-S39</b> | Spectroscopic data of compound <b>2</b> , <b>4</b> and <b>6-11</b>                                                                            |
| <b>Page S40:</b>    | K-B disk diffusion test against <i>S. aureus</i> , <i>B. subtilis</i> and <i>E. faecalis</i> .                                                |

The  $^1\text{H}$  NMR spectrum of compound 1

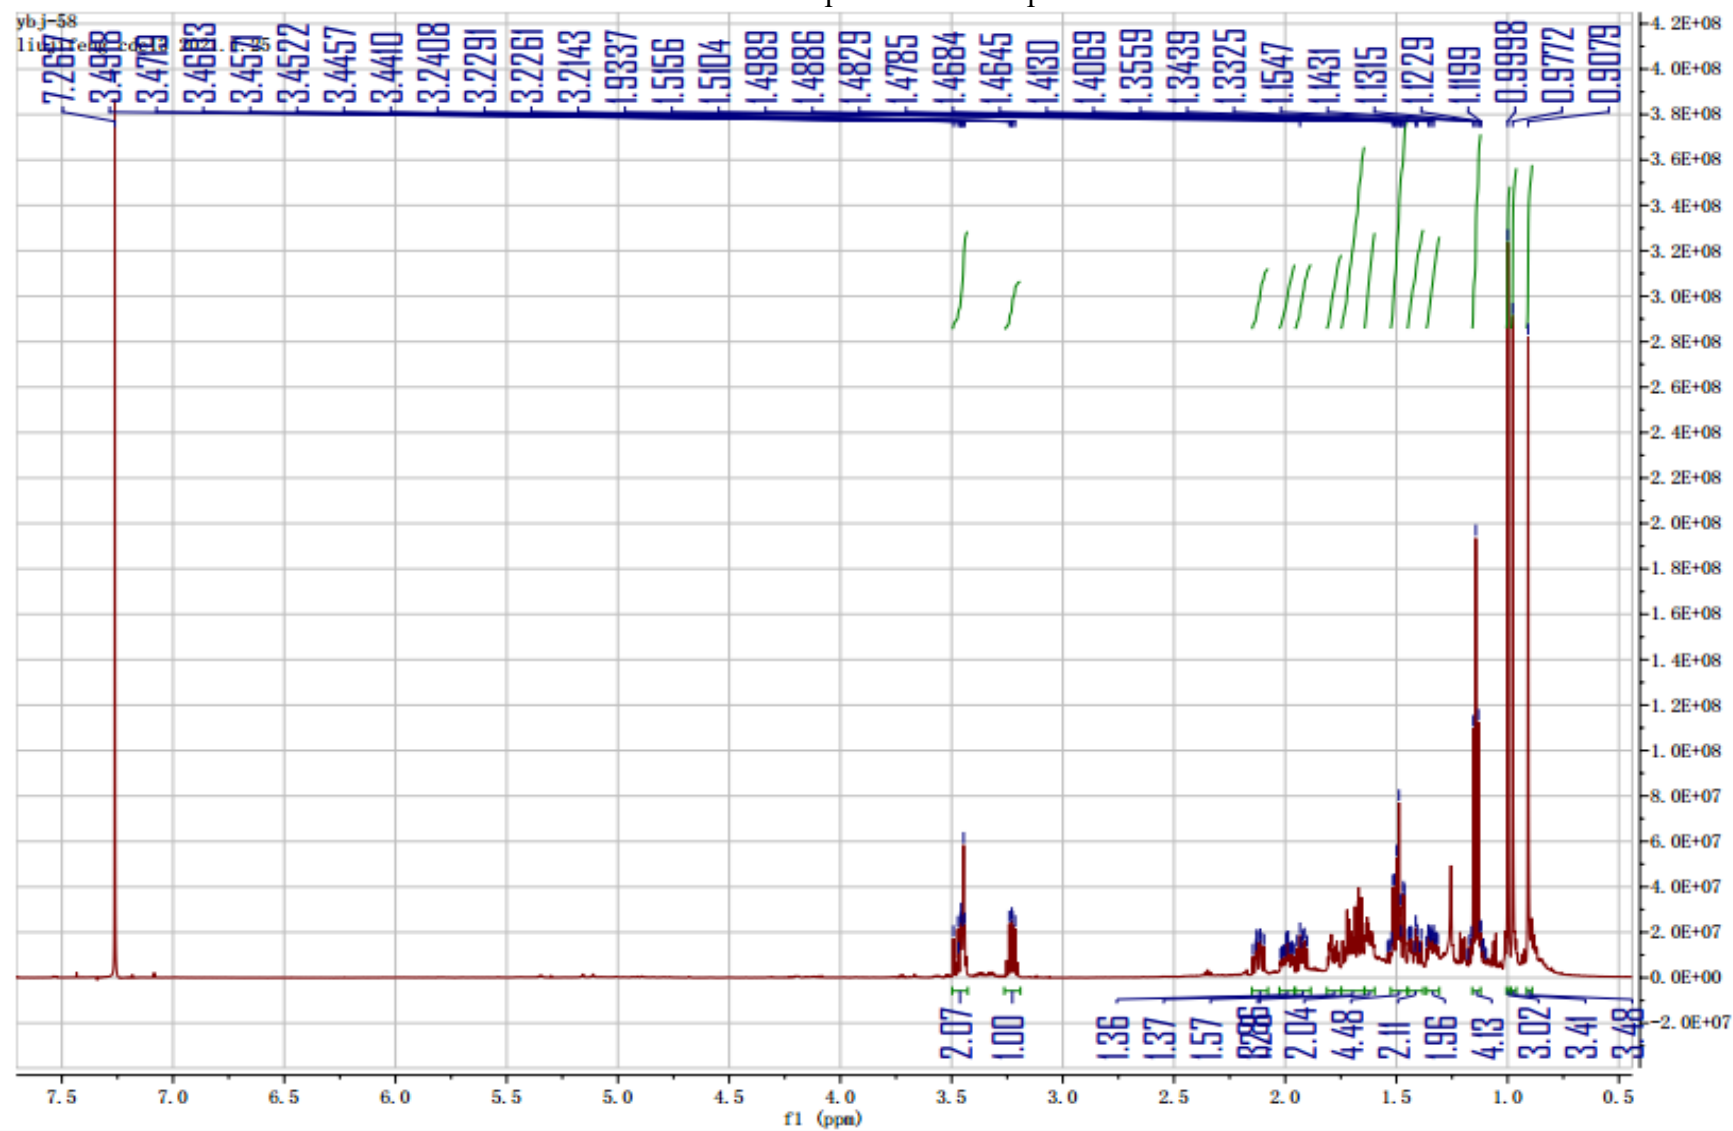

The  $^1\text{H}$  NMR spectrum of compound **1**

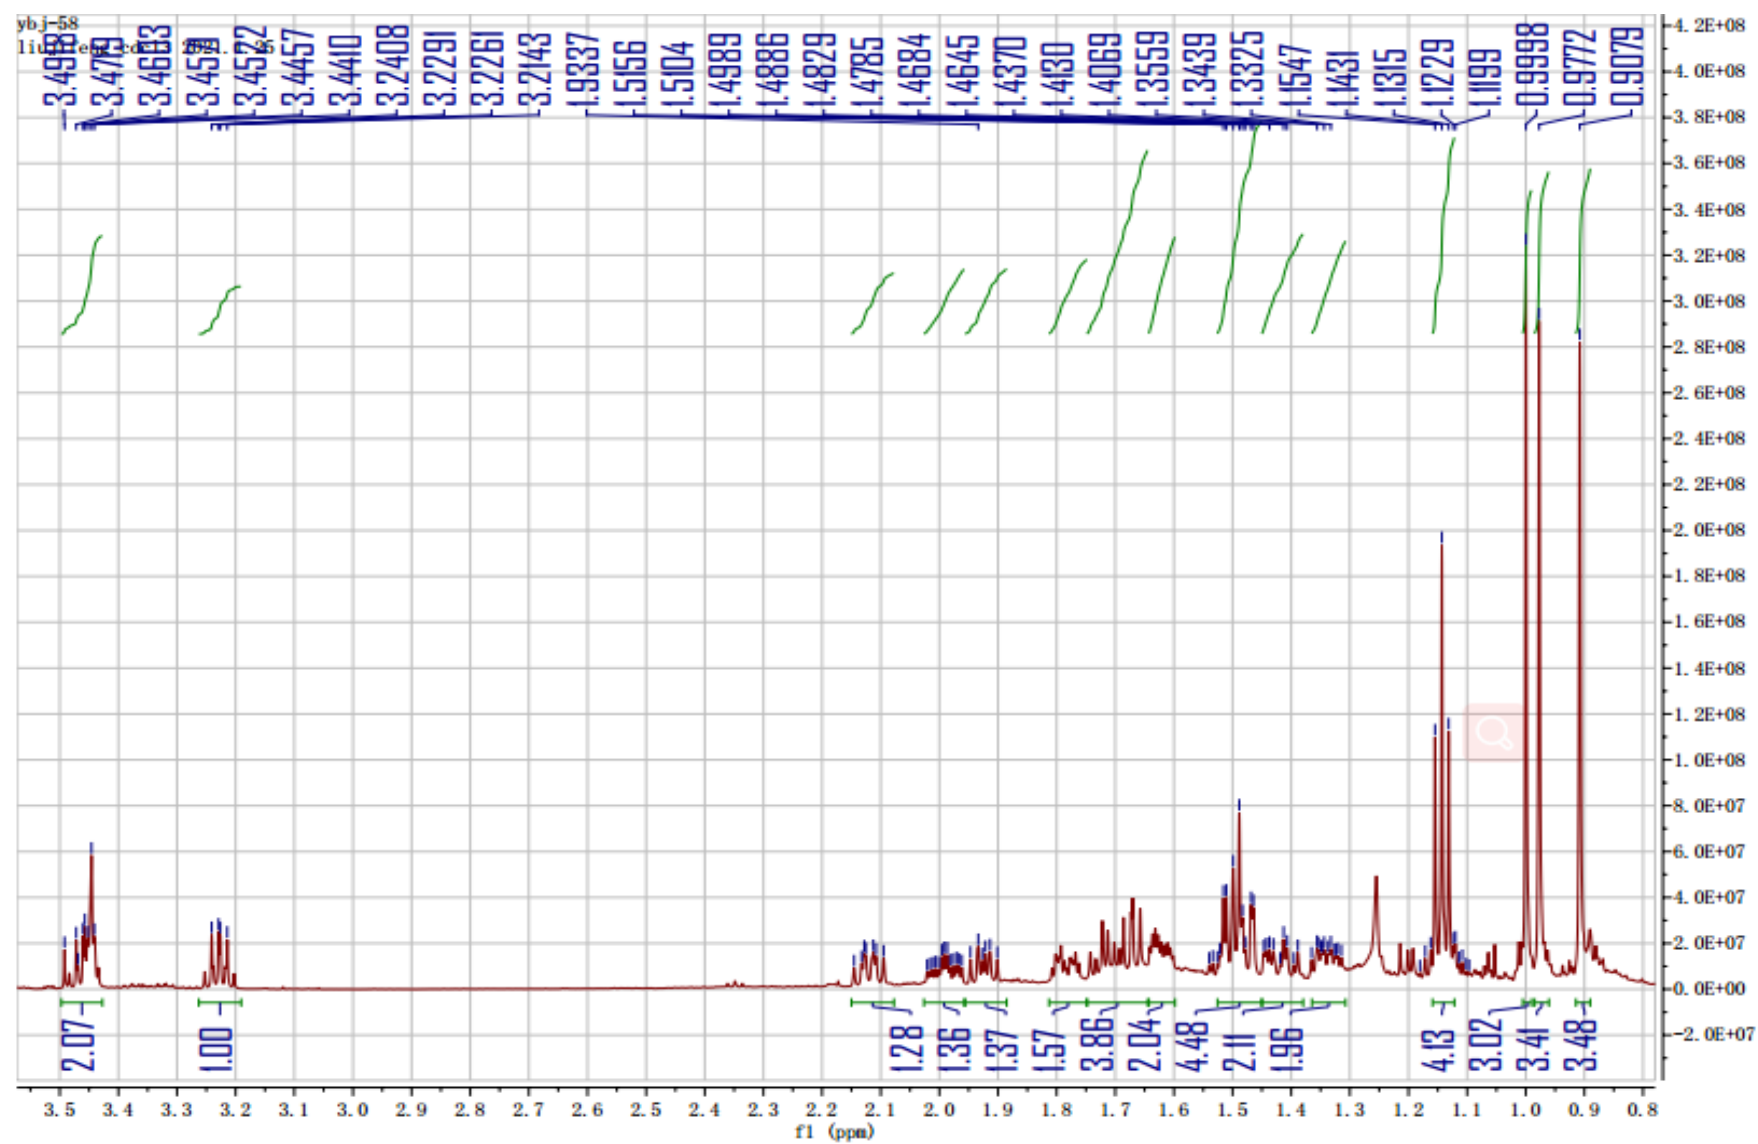

The  $^{13}\text{C}$  NMR of compound 1

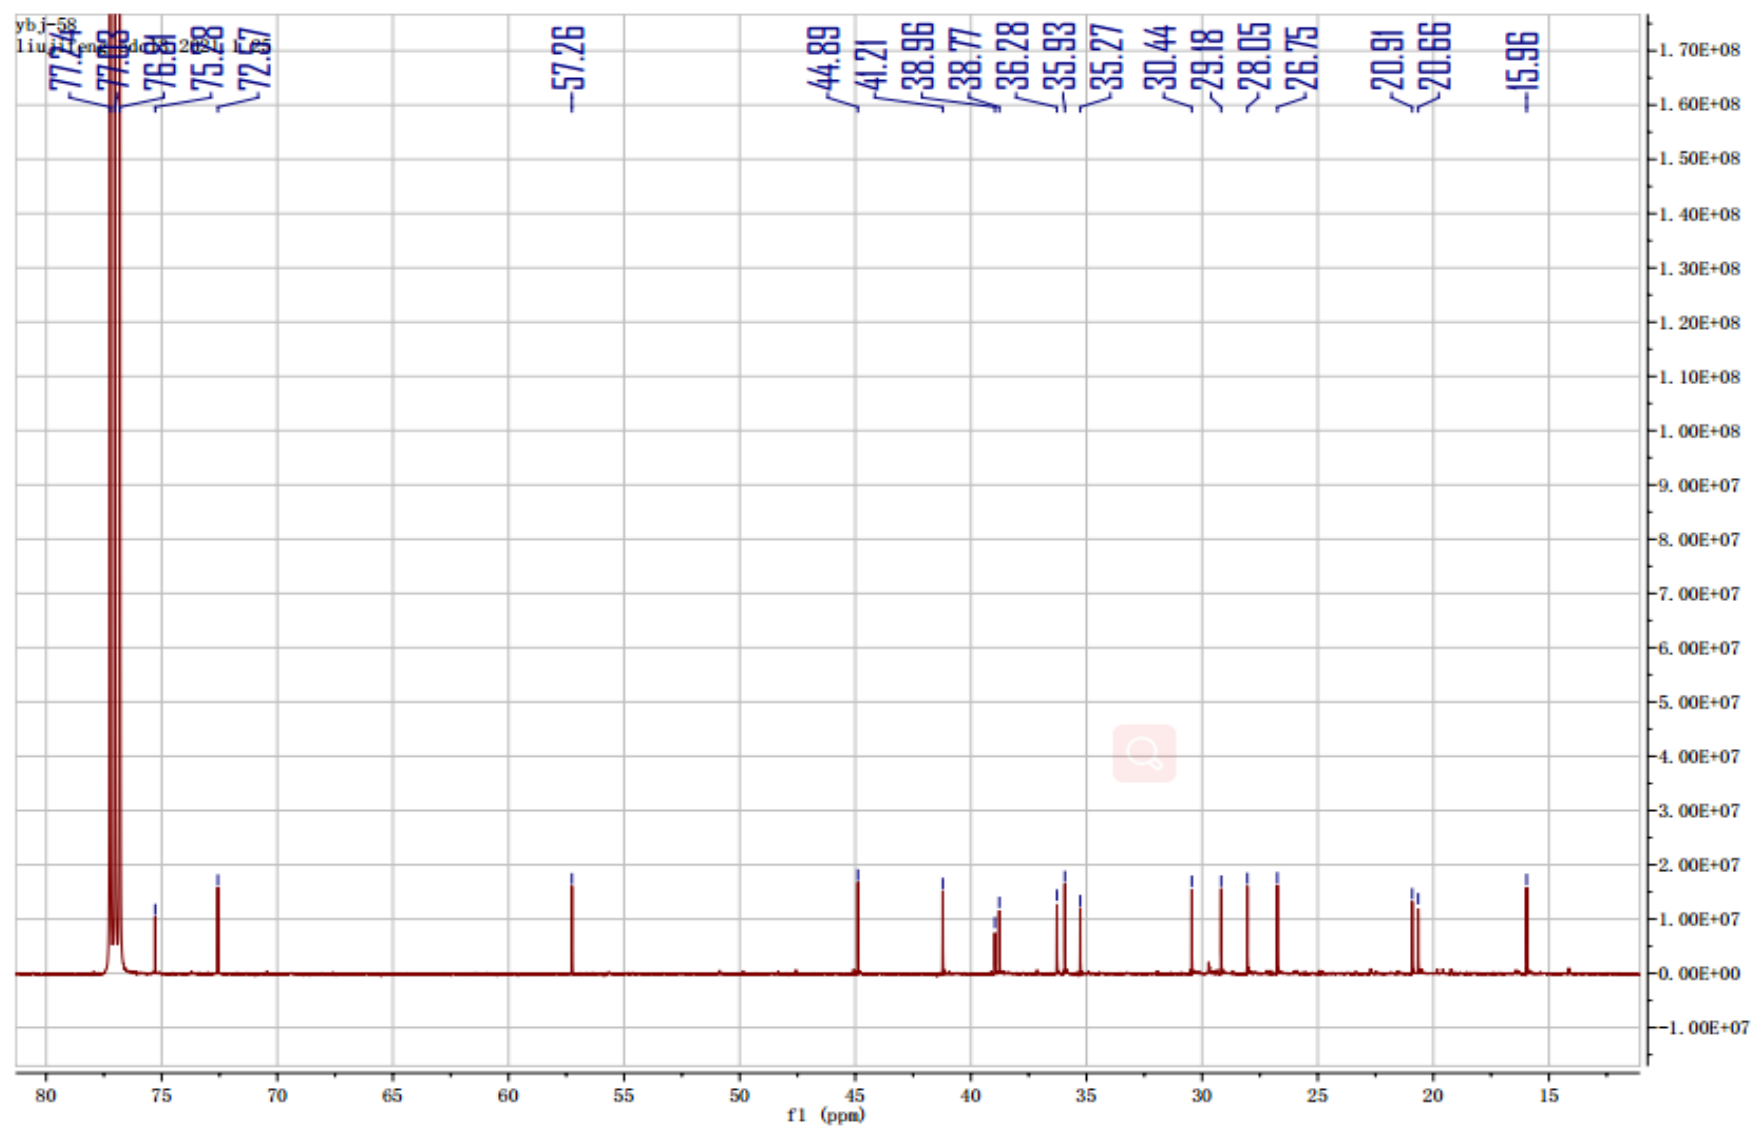

The DEPT-135 spectrum of compound 1

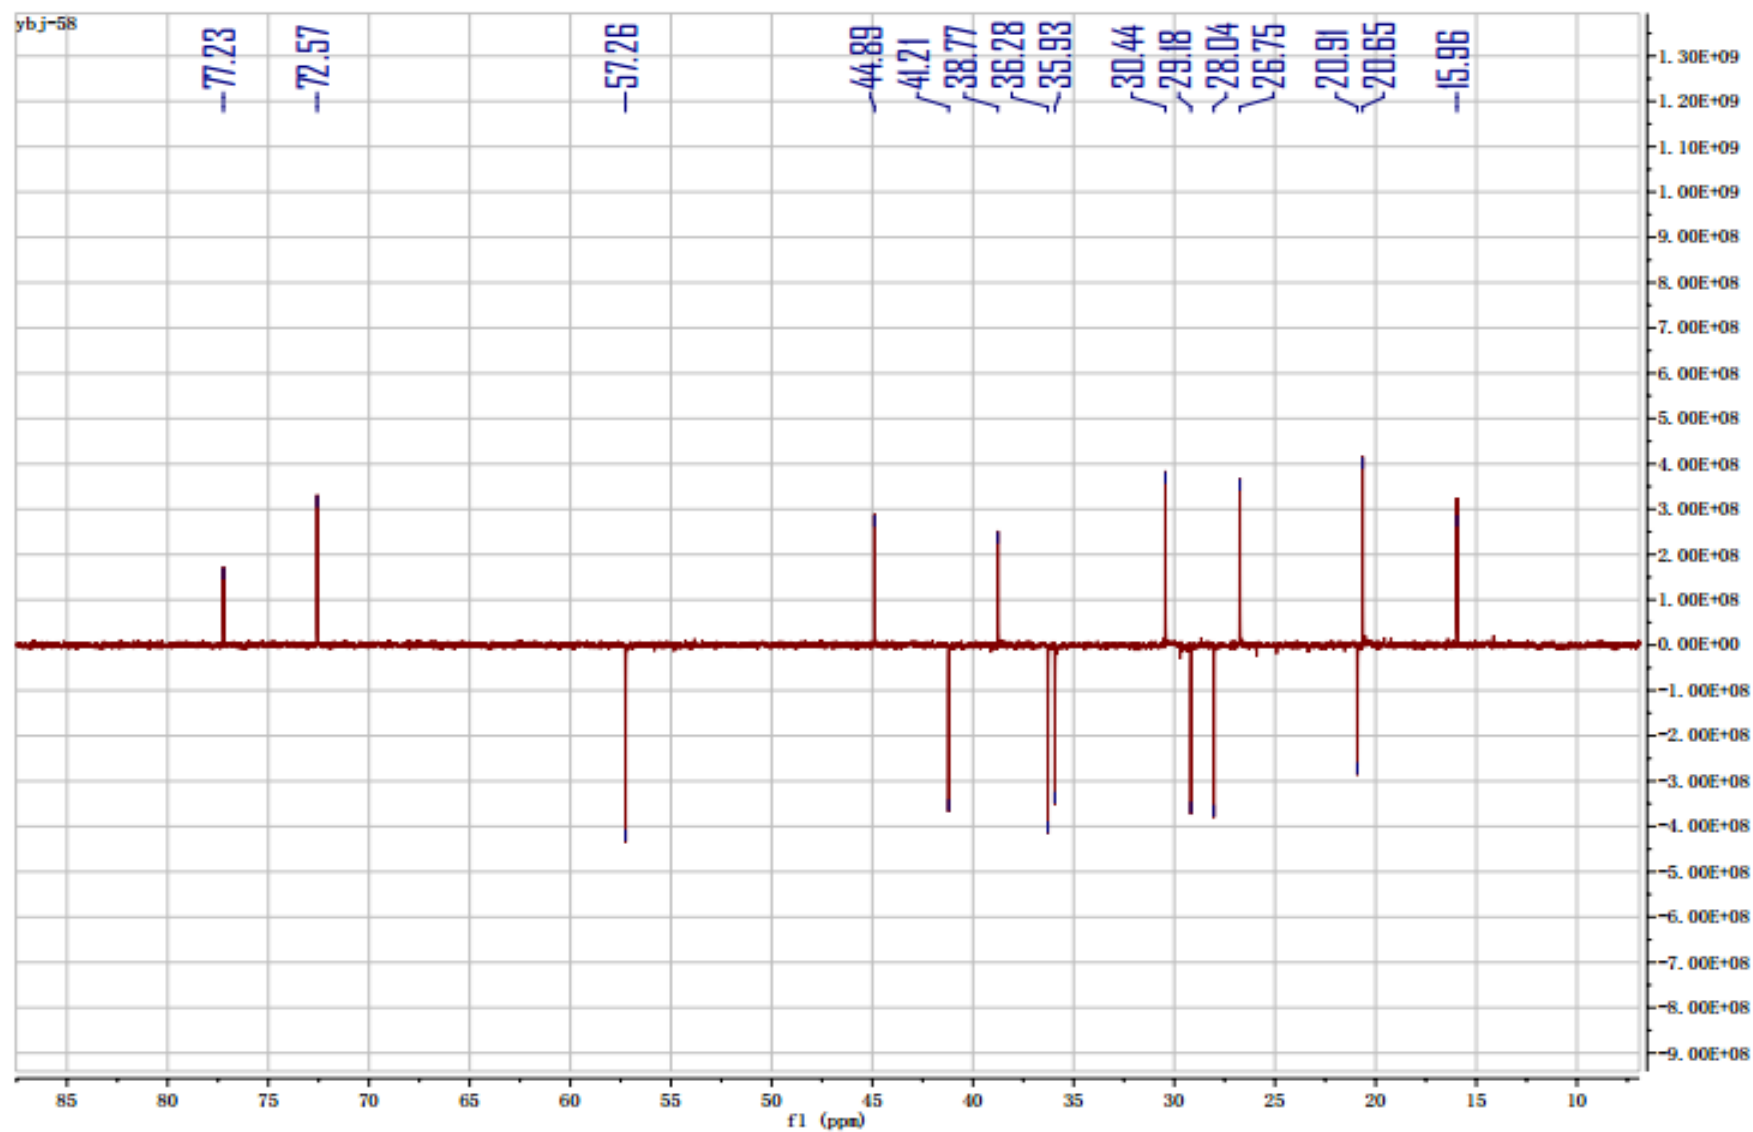

The DEPT-90 spectrum of compound 1

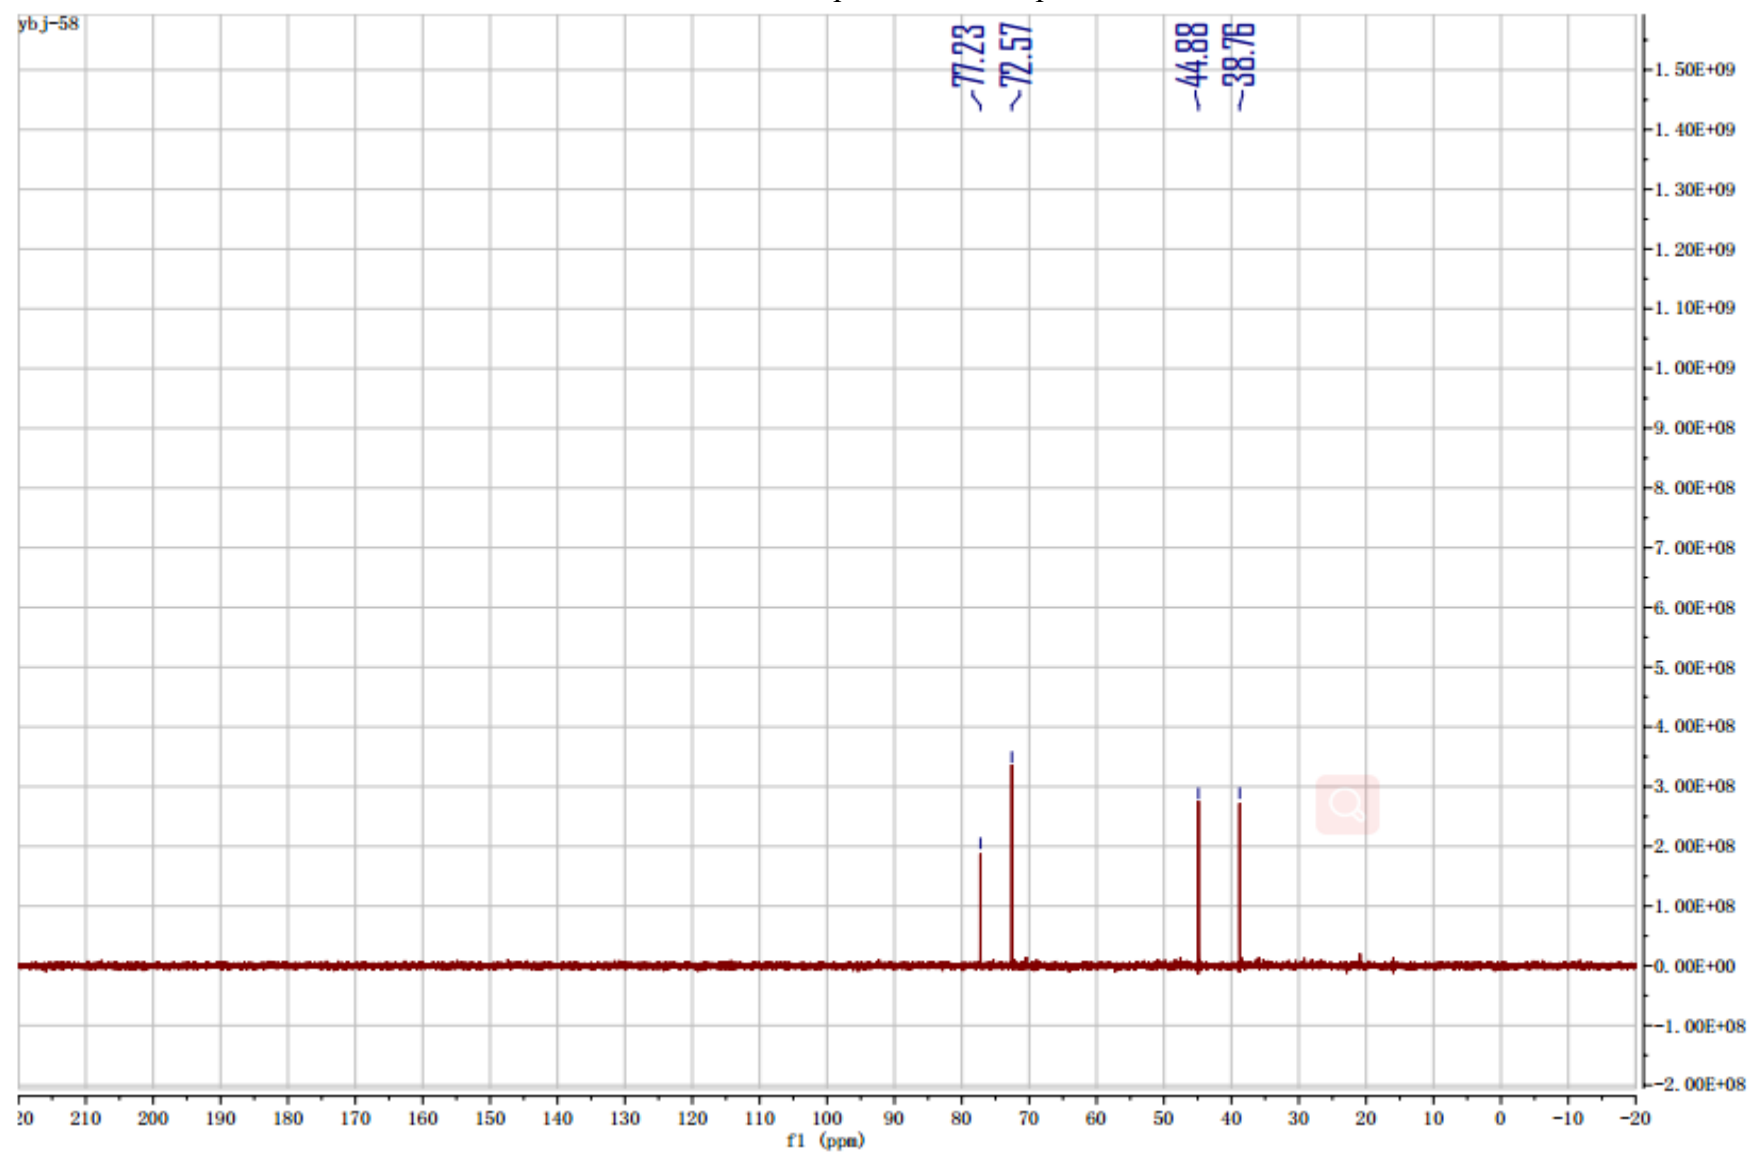

The HSQC spectrum of compound 1

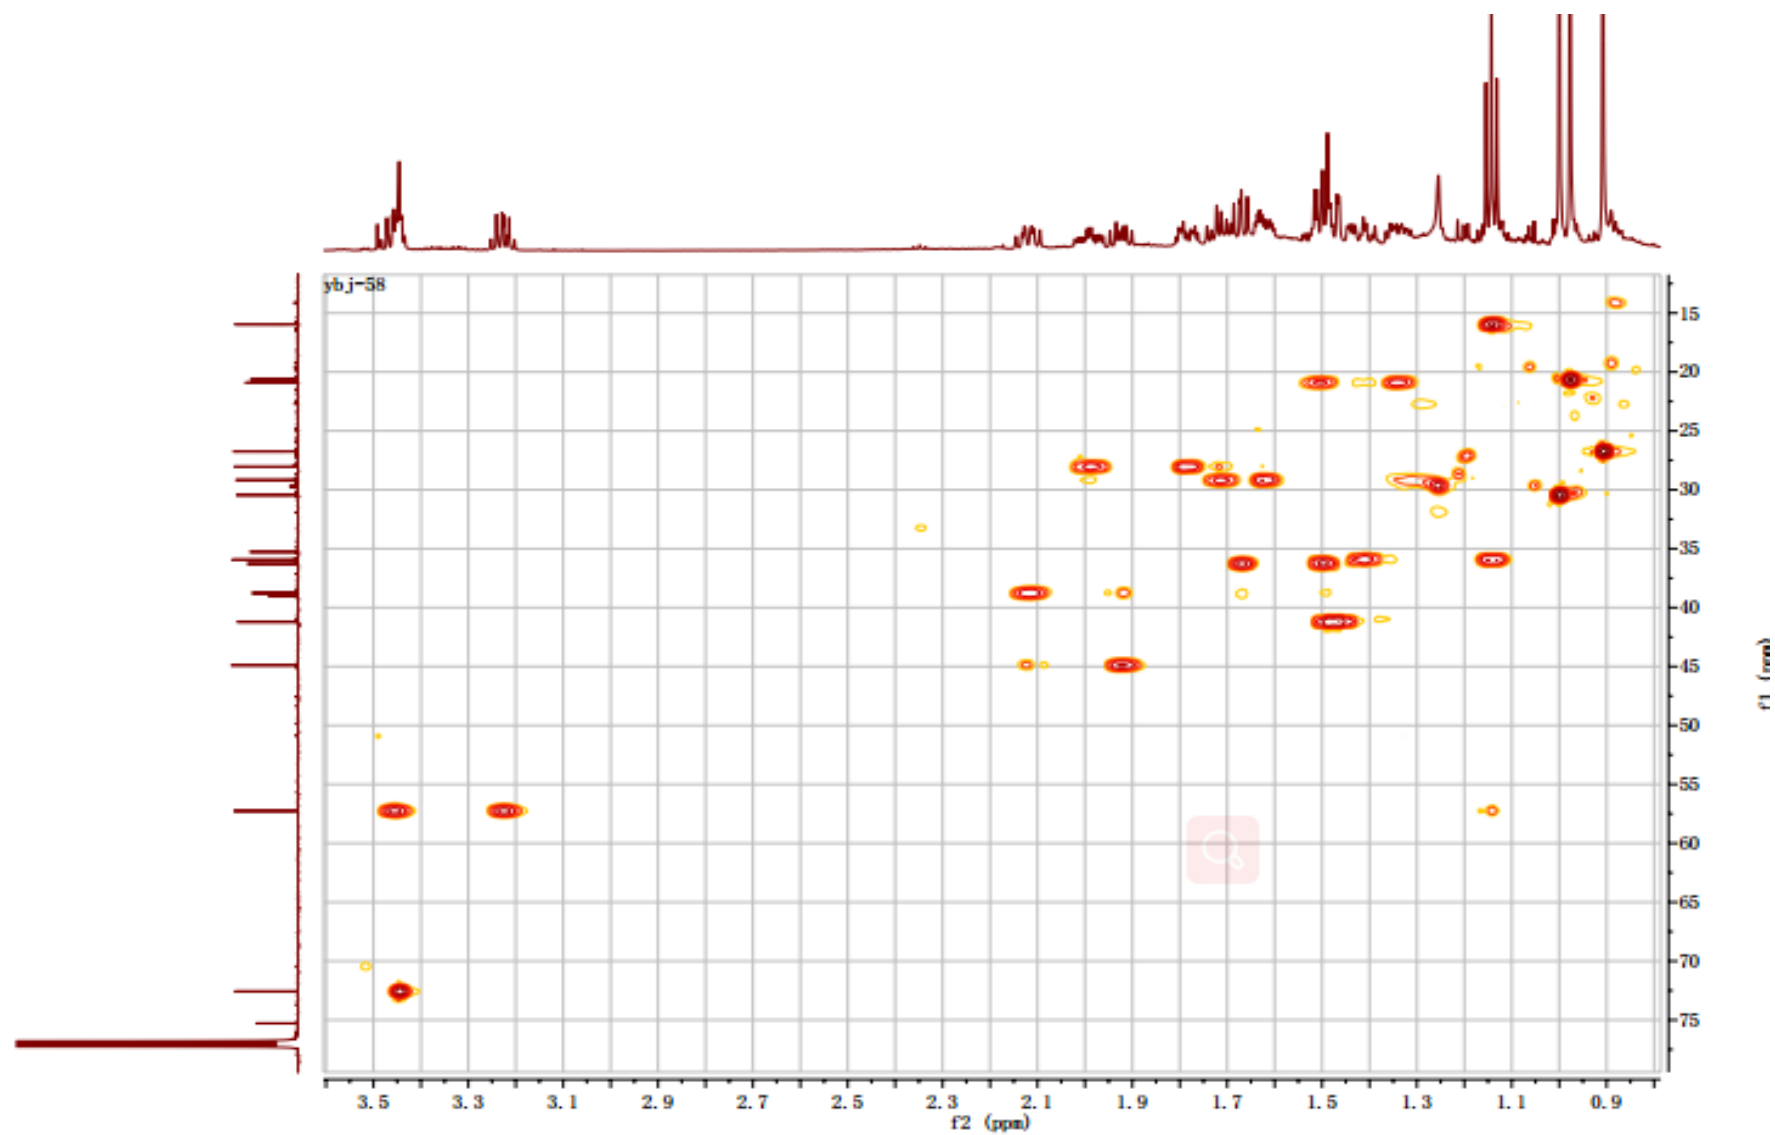

The HMBC spectrum of compound 1

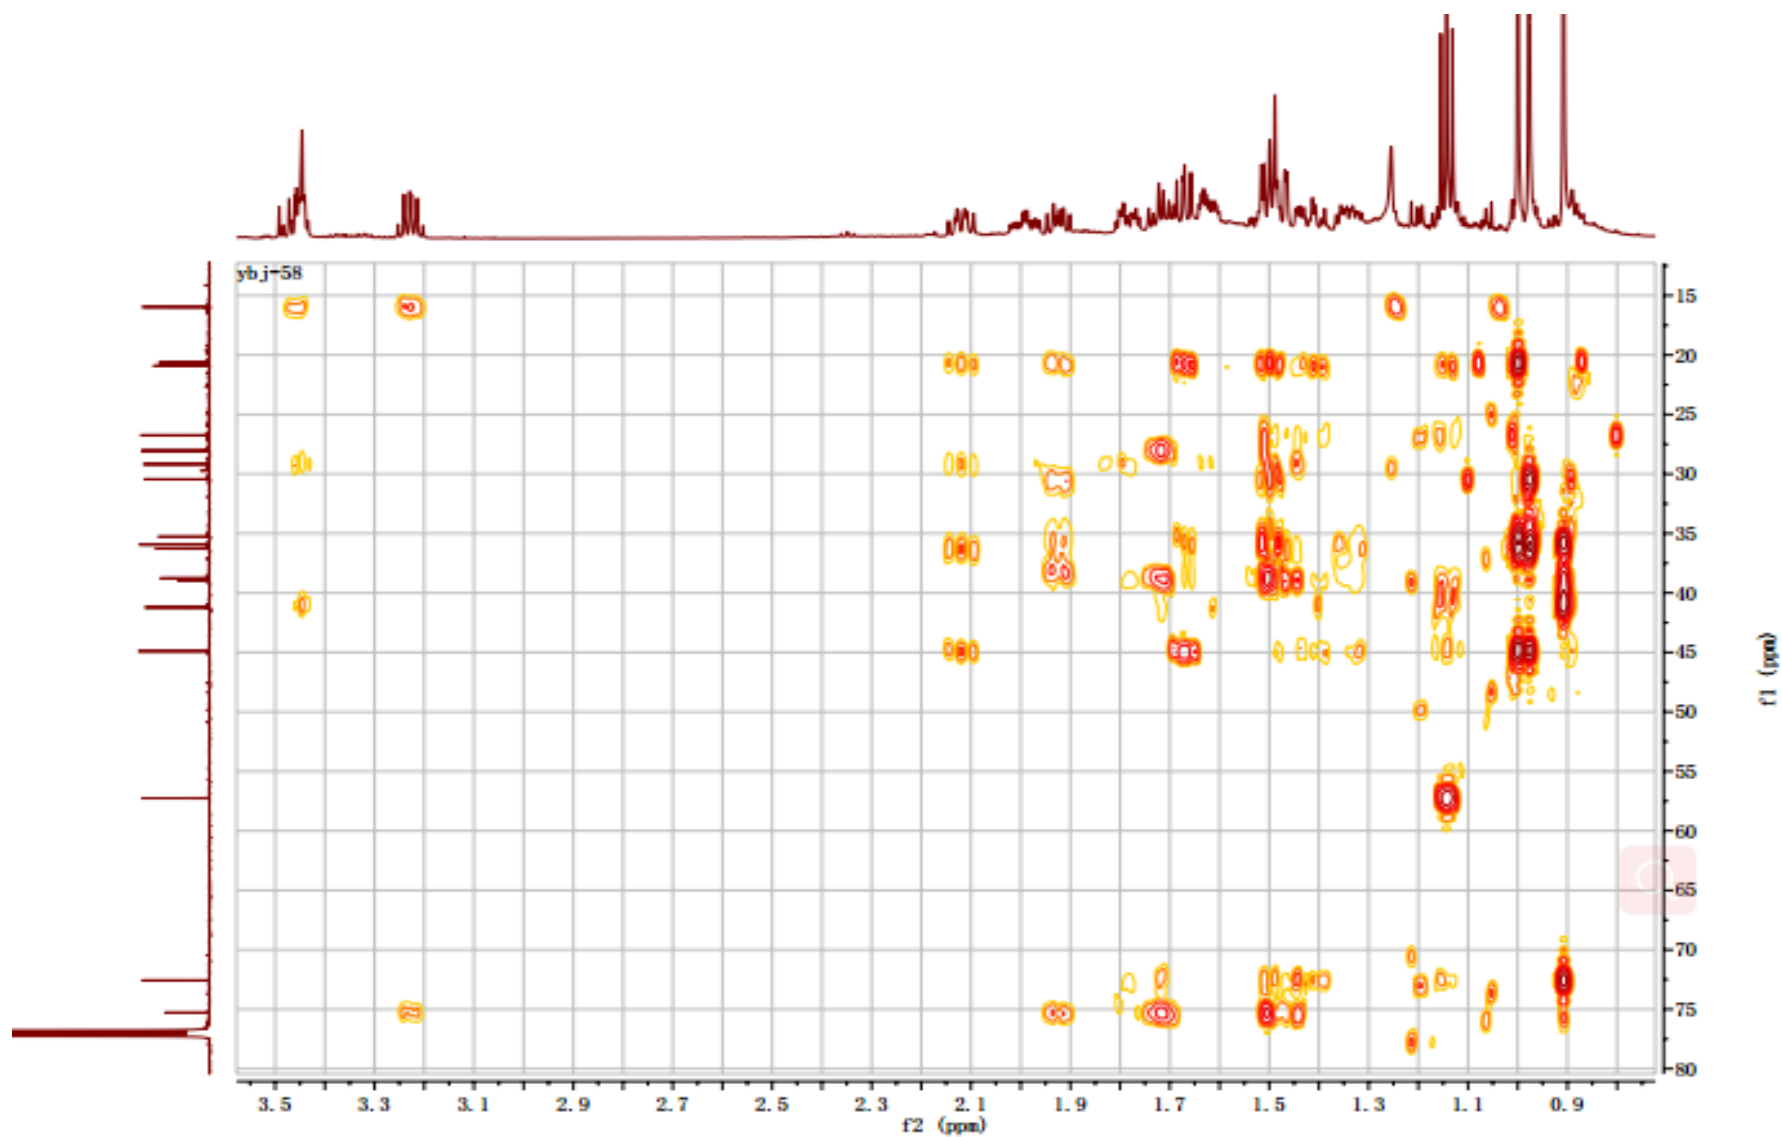



The COSY spectrum of compound 1

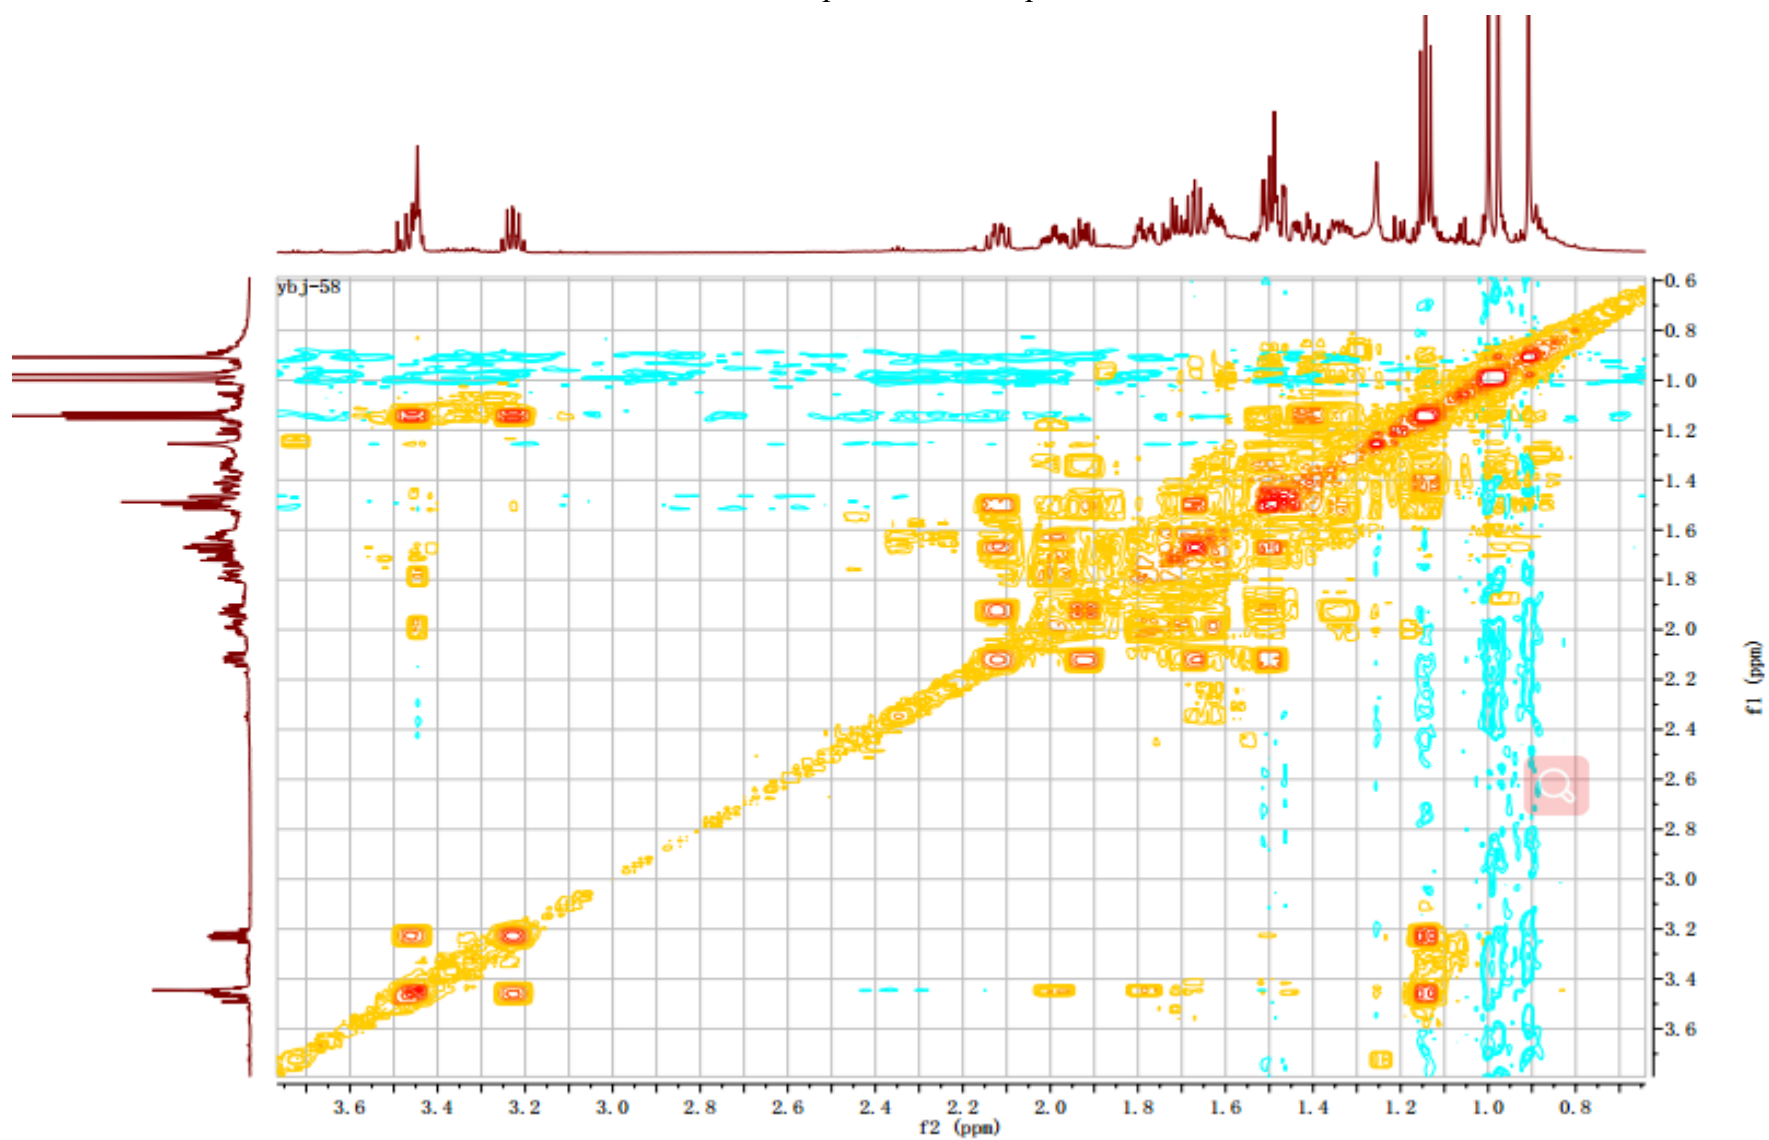

The ROESY spectrum of compound 1

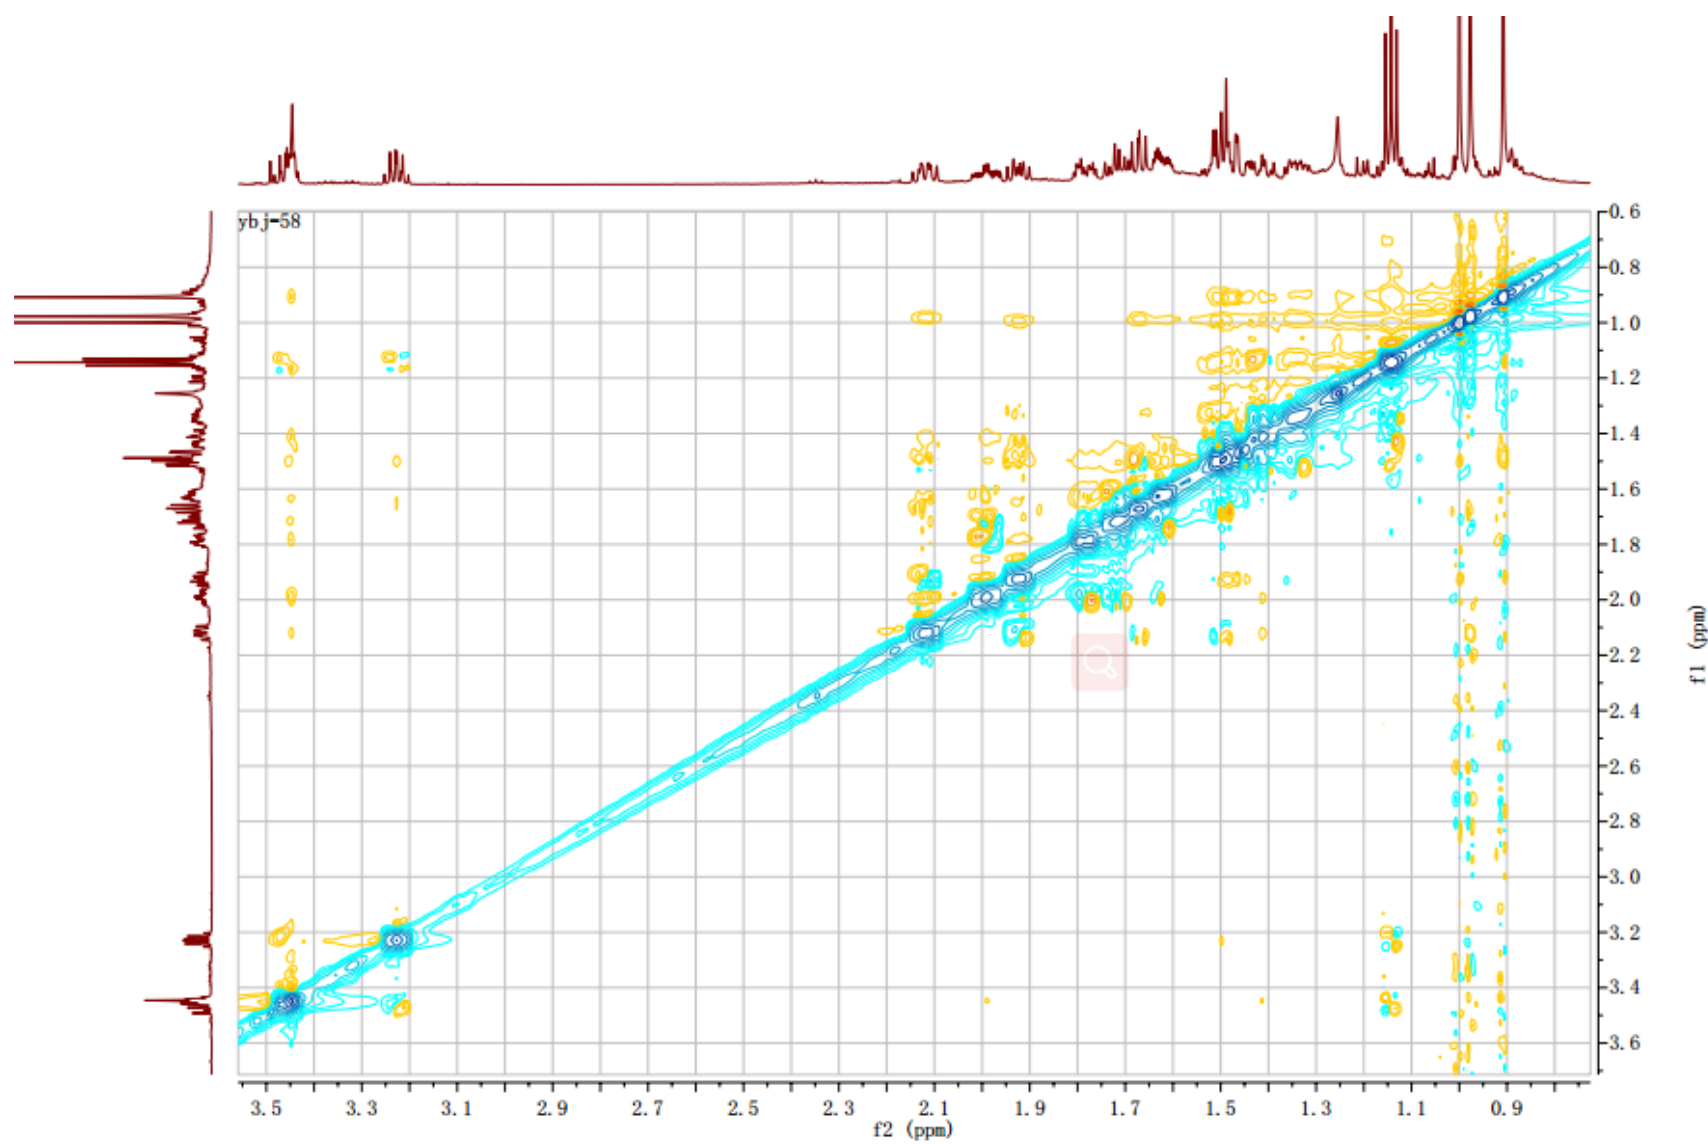

# The HR-ESI-MS of compound 1

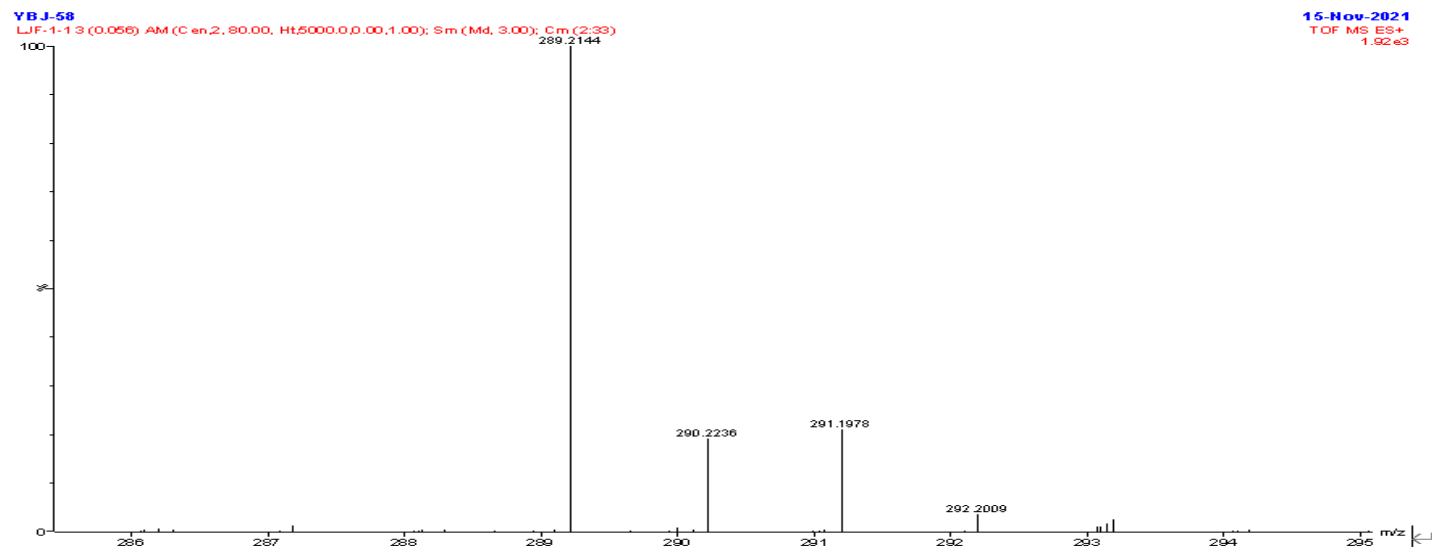

## Elemental Composition Report

### Single Mass Analysis

Tolerance = 50.0 PPM / DBE: min = -1.5, max = 50.0

Selected filters: None

Monoisotopic Mass, Even Electron Ions

92 formula(e) evaluated with 3 results within limits (all results (up to 1000) for each mass)

Elements Used:

C: 0-500 H: 0-1000 O: 0-20 Na: 0-1

Minimum: -1.5

Maximum: 10.0 50.0 50.0

| Mass     | Calc. Mass | mDa  | PPM  | DBE | i-FIT | Formula       |
|----------|------------|------|------|-----|-------|---------------|
| 289.2144 | 289.2168   | -2.4 | -8.3 | 5.5 | 167.1 | C19 H29 O2    |
|          | 289.2144   | 0.0  | 0.0  | 2.5 | 169.8 | C17 H30 O2 Na |
|          | 289.2015   | 12.9 | 44.6 | 1.5 | 175.6 | C15 H29 O5    |

The IR (KBr) of compound 1

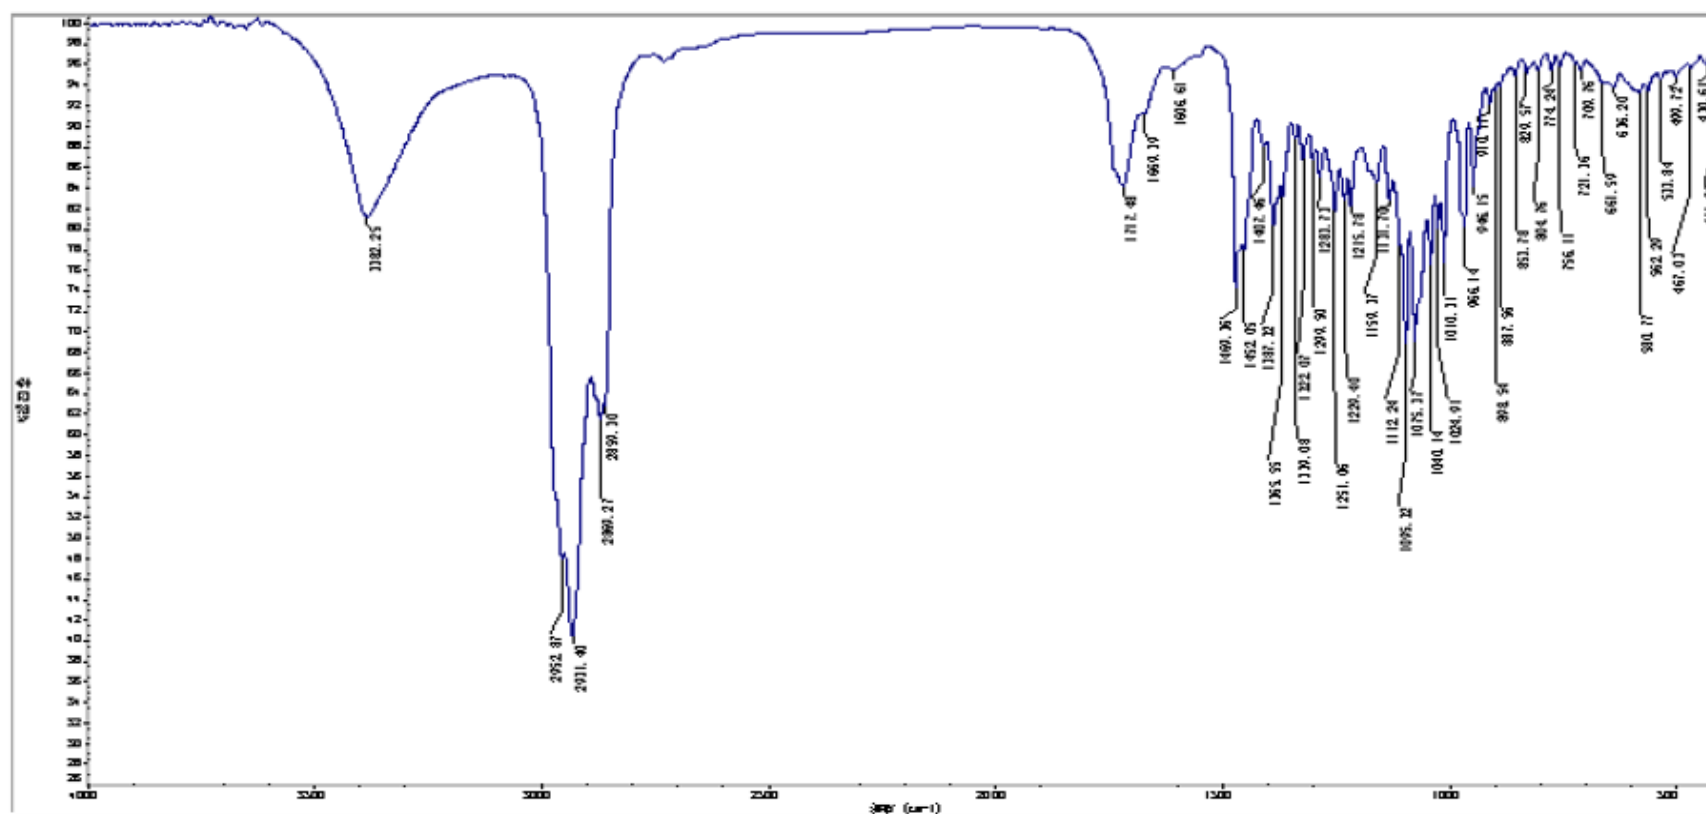

Sample Name: YBJ-58

KBr压片

(Measured on)

采集时间: 星期四 10月 14 15:31:30 2021 (CMT+08:00)

仪器型号: NICOLET iS10 (Instrument)

(Sample scan) 样品扫描次数: 16

背景扫描次数: 16

(Resolution) 分辨率: 4.000

采样增益: 1.0

扫描速度: 0.4747

(Acquisition) 光圈: 80.00

# The UV spectrum of compound 1

数据表: YBJ-58 - RawData

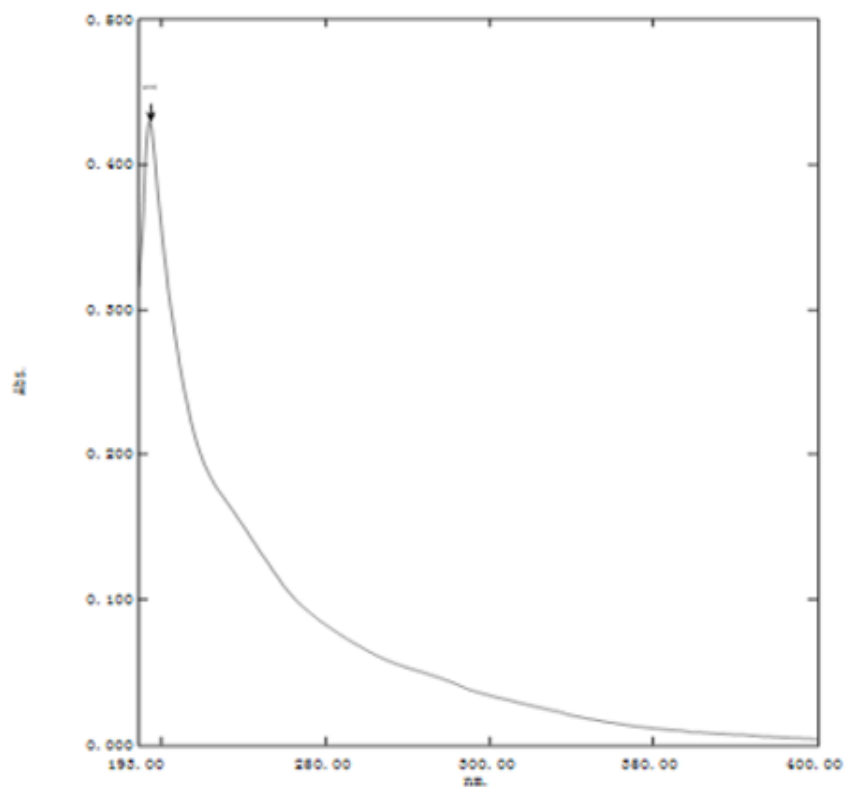

【测量属性】  
 波长范围 (nm): 190.00 到 600.00  
 扫描速度: 中速  
 采样间隔: 0.5  
 自动采样间隔: 停用  
 扫描模式: 单个

Wavelength Range  
 Scan Speed: Medium  
 Sampling Interval: 0.5  
 Auto Sampling Interval: Enabled  
 Scan Mode: Auto

【仪器属性】  
 仪器类型: UV-2700 系列  
 测量方式: 吸收值  
 狭缝宽: 5.0 nm  
 积分时间: 0.1 秒  
 光源转换波长: 325.0 nm  
 检测器单元: 双极  
 S/R 转换: 标准  
 阶梯校正: OFF

Instrument Properties  
 Instrument Type: UV-2700PC Series  
 Measuring Mode: Absorbance  
 Slit Width: 5.0 nm  
 Light Source Change Wavelength: 325.0 nm  
 S/R Exchange: Normal

【附件属性】  
 附件: 无

【数据处理参数】  
 阈值: 0.0010000  
 点: 4  
 内插: 停用  
 平均: 停用

【样品池属性】  
 类型: 石英  
 体积: 10mm  
 附加信息: 样品浓度: 0.0681毫克/毫升  
 溶剂: 甲醇

Sample concentration: 0.0681 mg/mL  
 Solvent: MeOH

| No. | F/V | 波长 (nm) | Abs.  | 描述 |
|-----|-----|---------|-------|----|
| 1   |     | 196.50  | 0.430 |    |

The  $^1\text{H}$  NMR spectrum of compound **3**

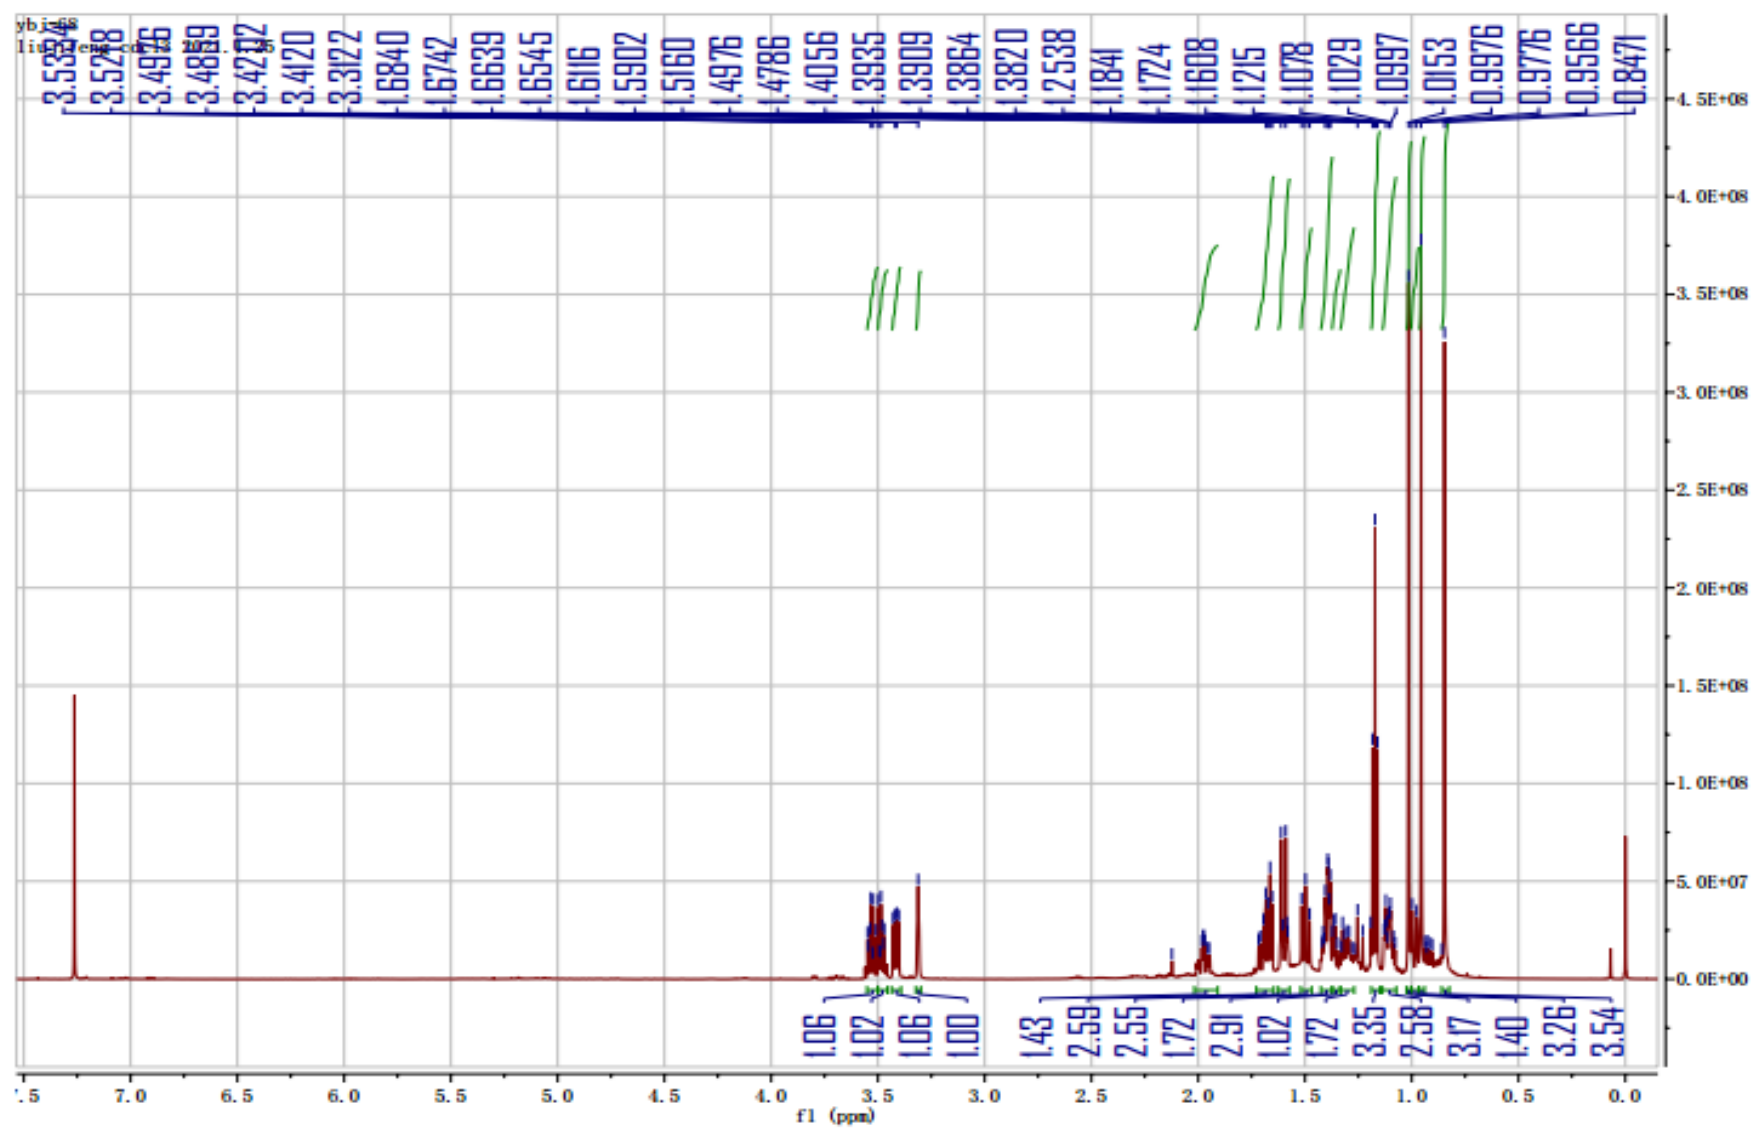

The  $^1\text{H}$  NMR spectrum of compound **3**

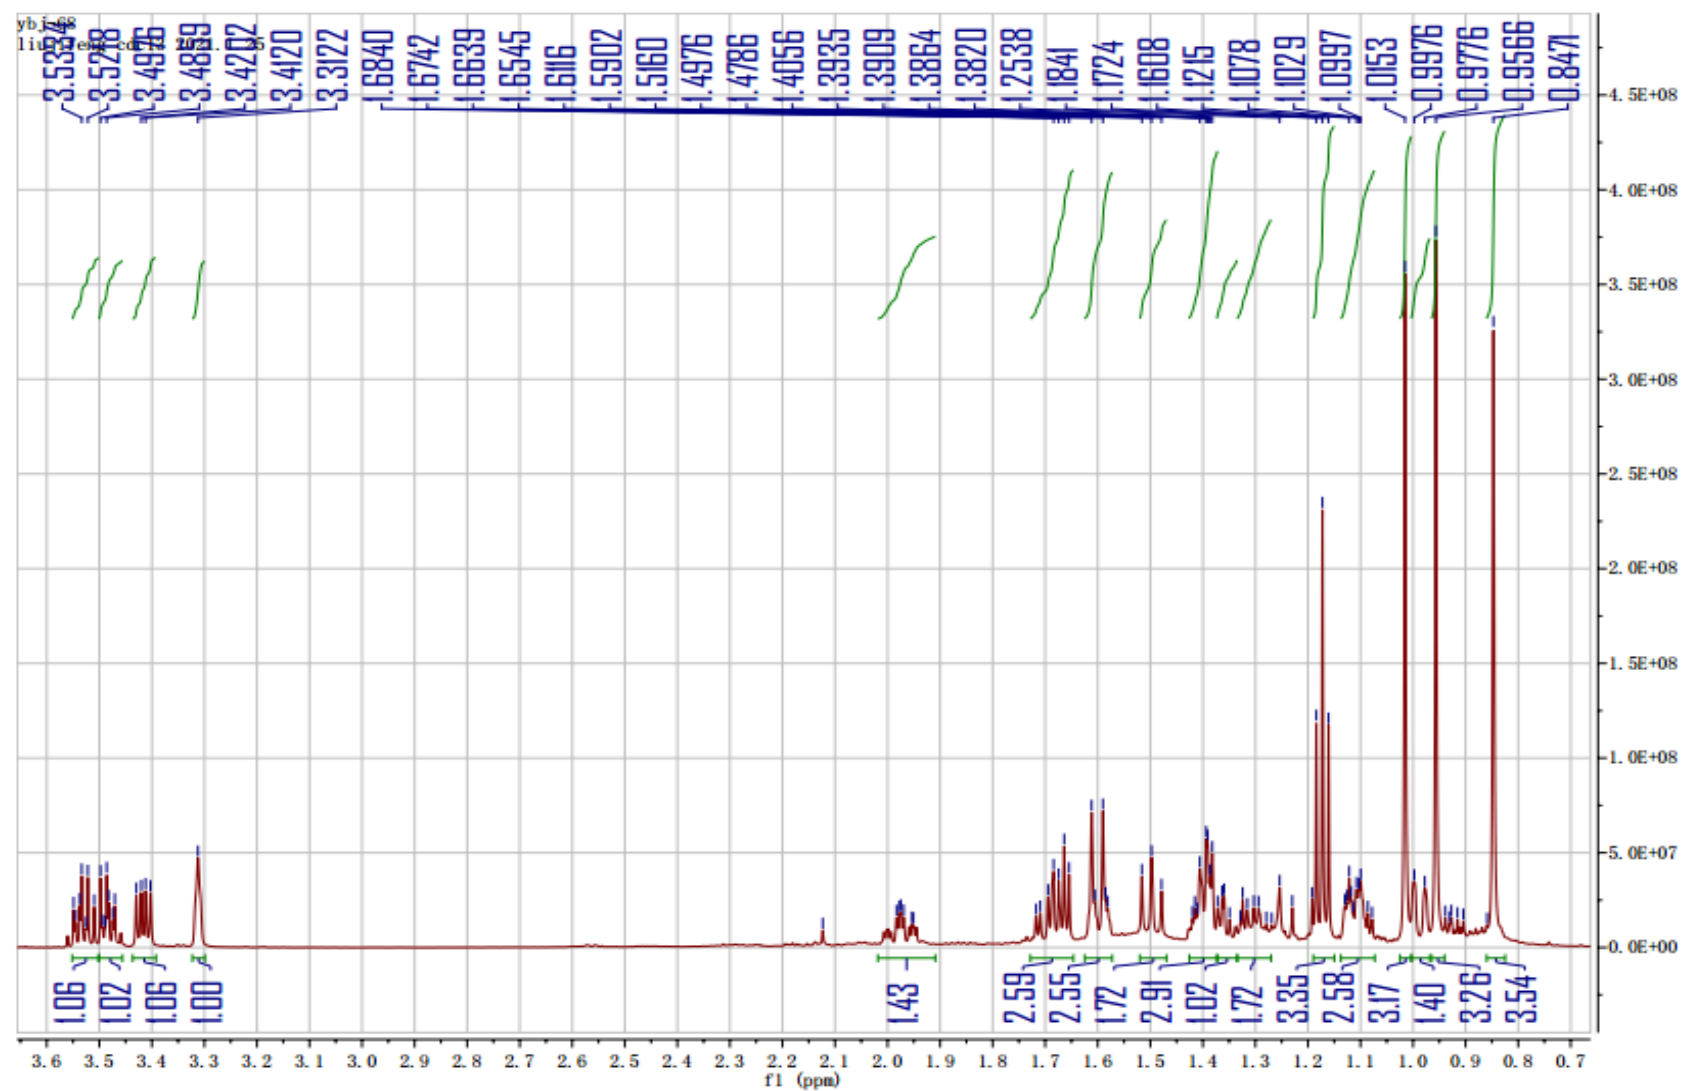

The  $^{13}\text{C}$  NMR spectrum of compound **3**

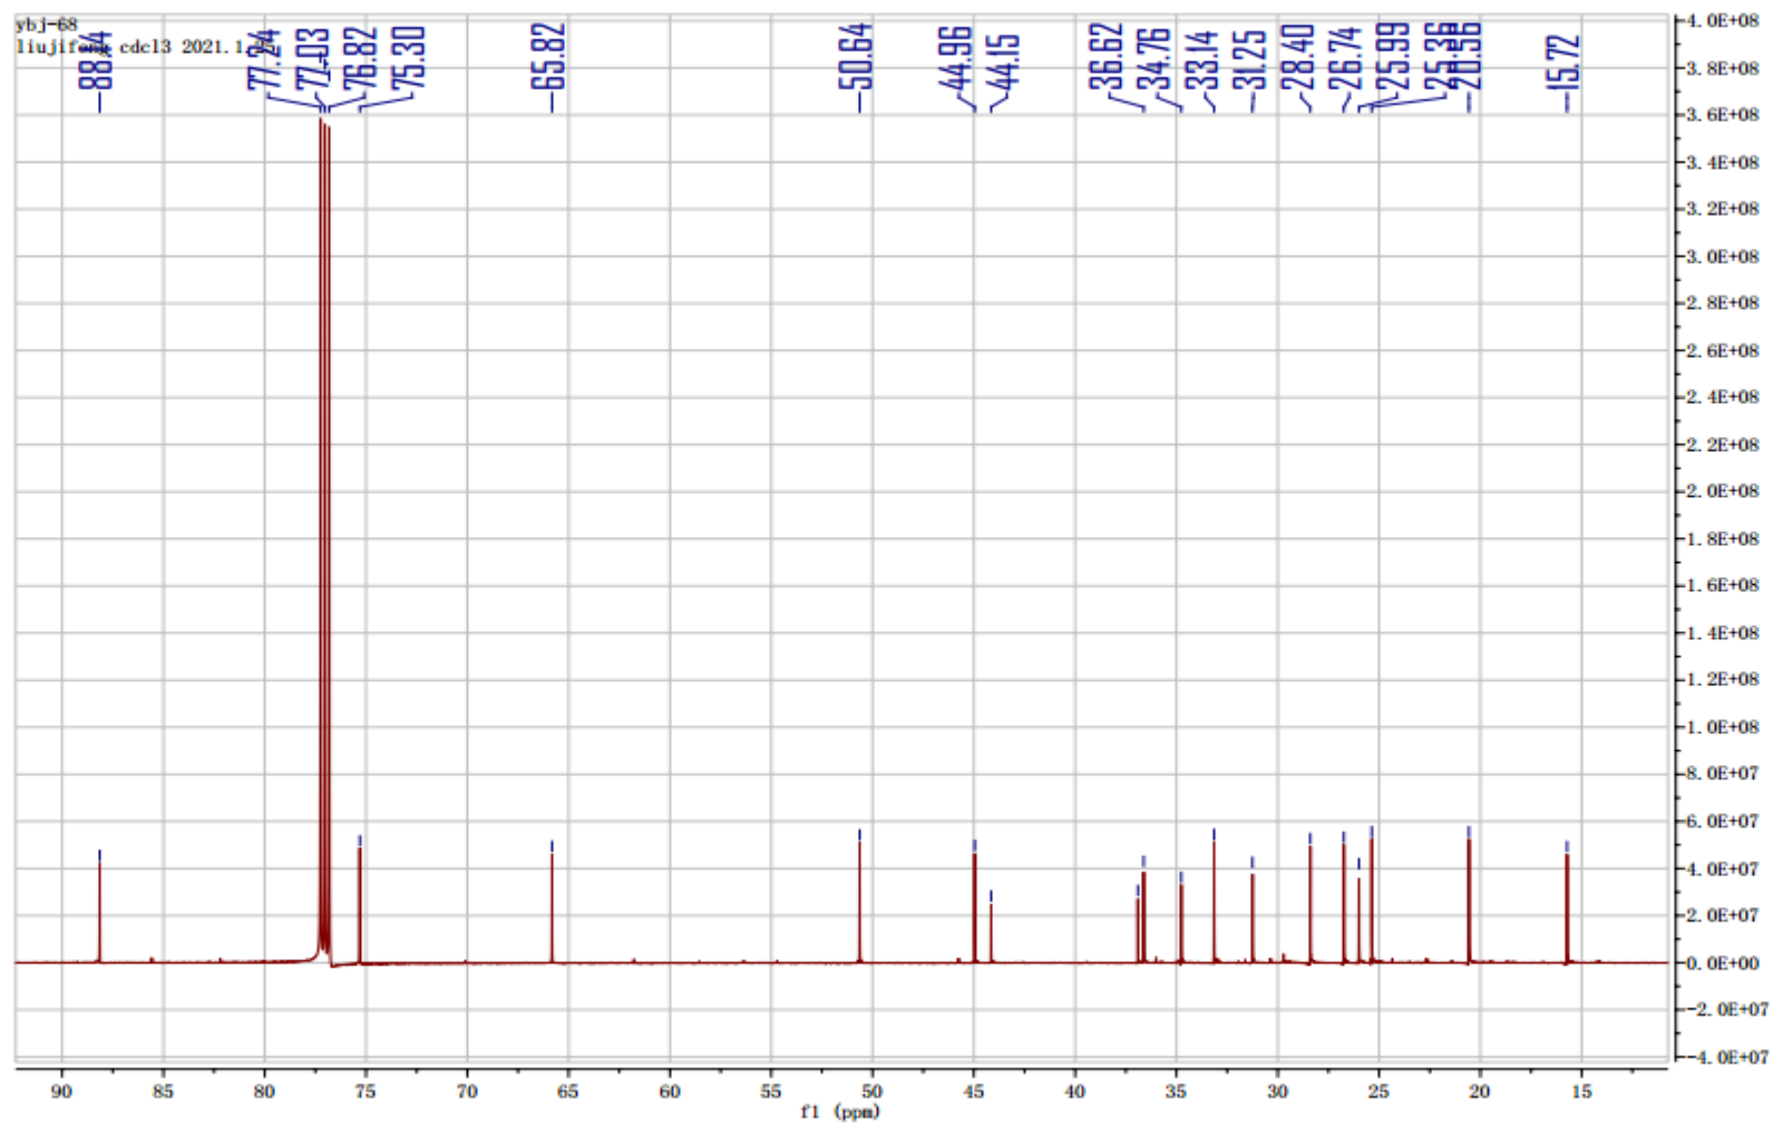



The DEPT-135 spectrum of compound 3

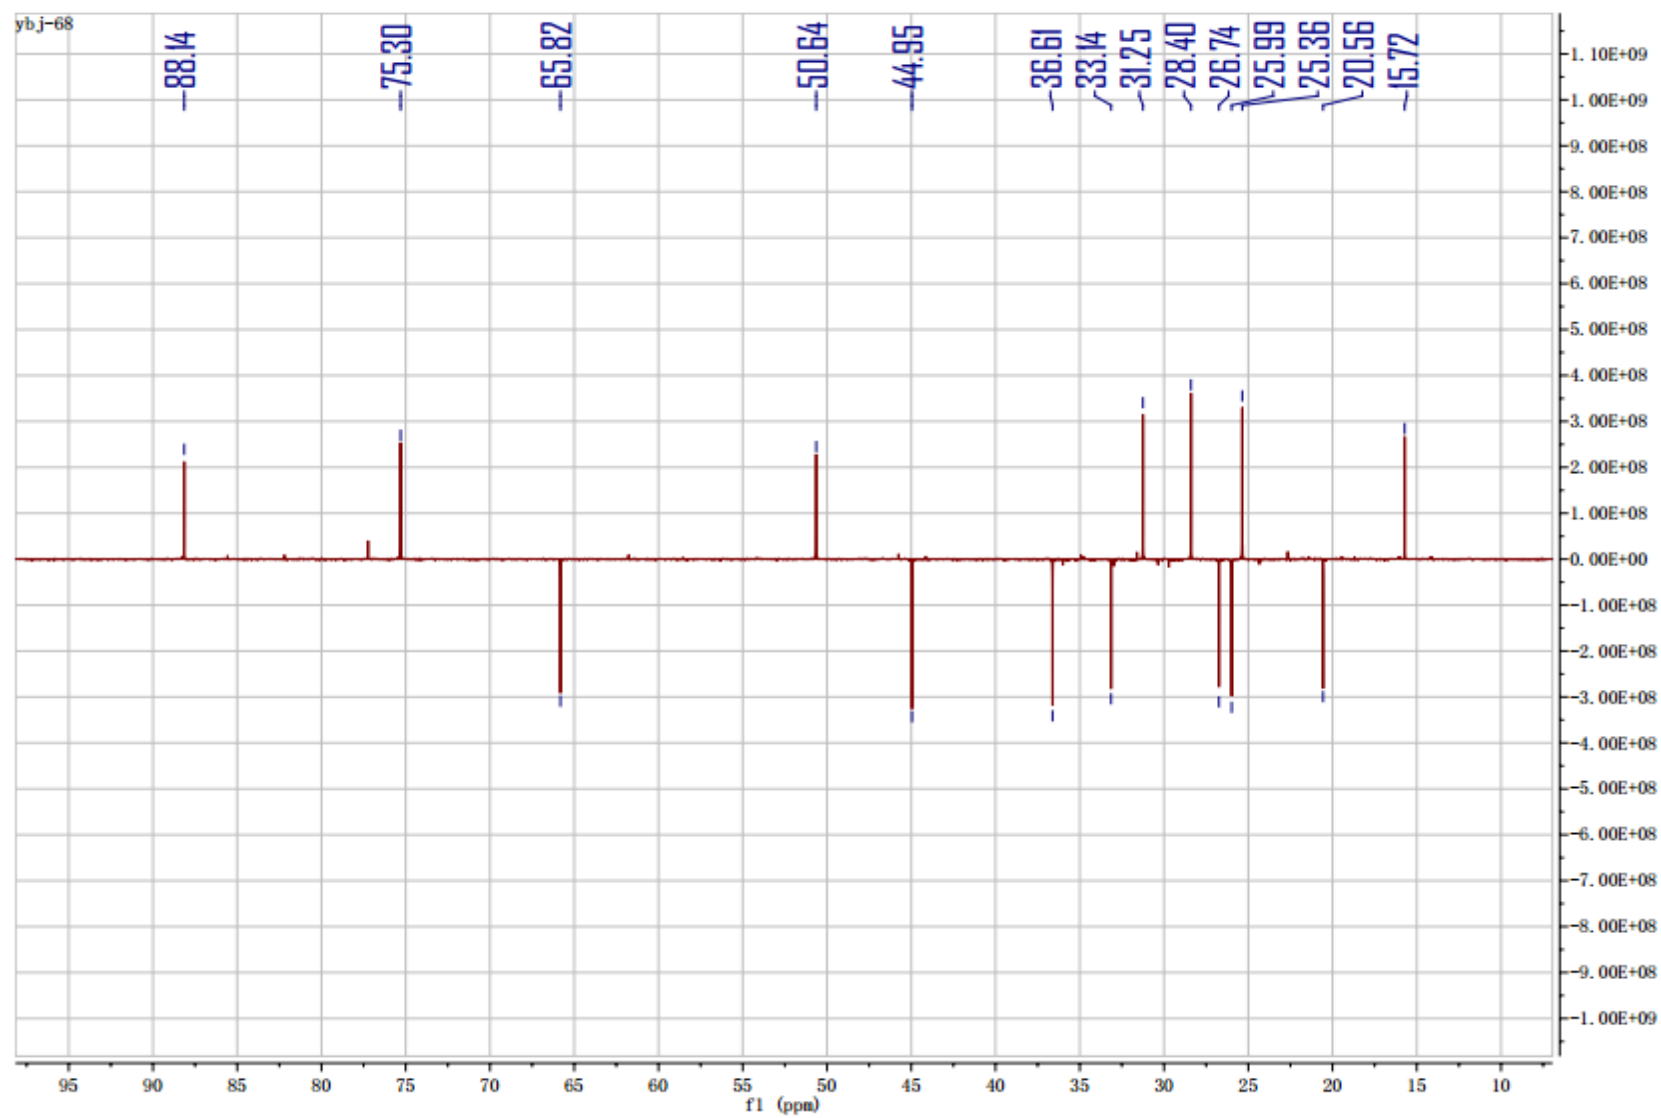

The DEPT-90 spectrum of compound **3**

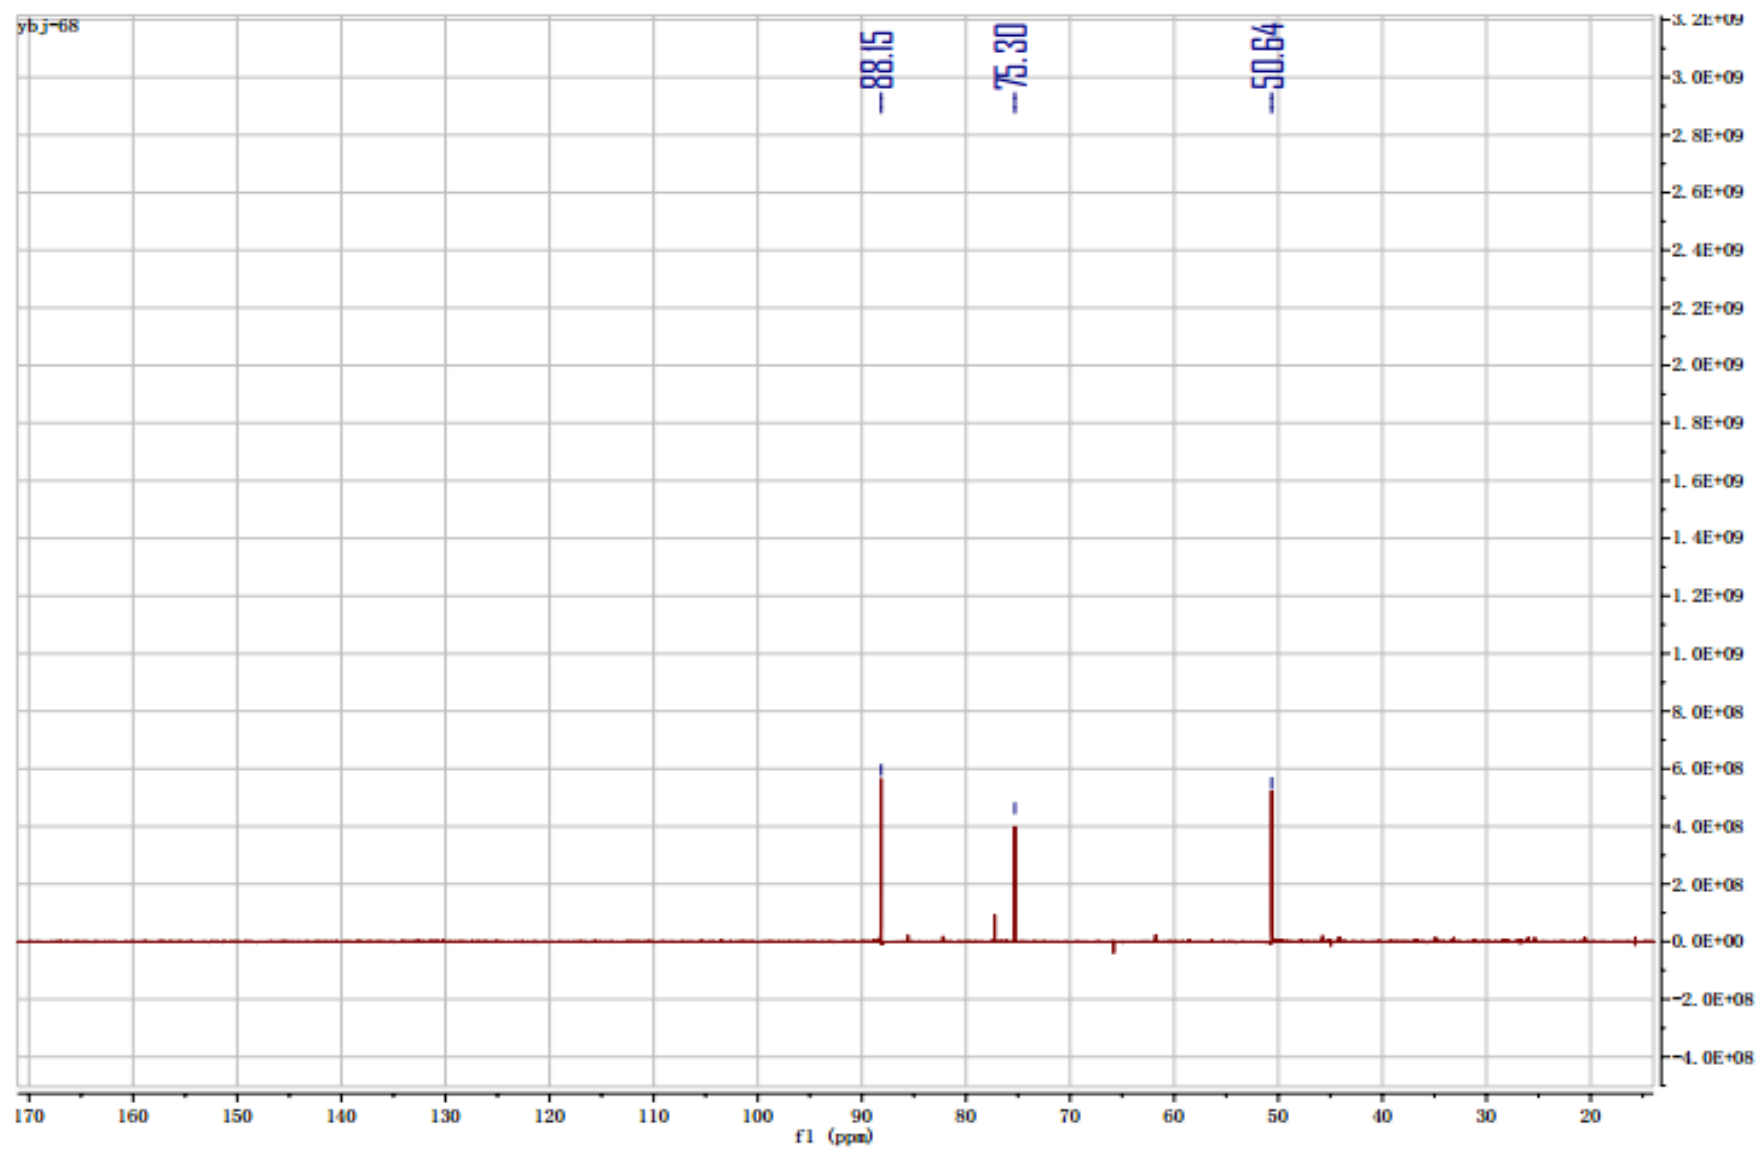

The HSQC spectrum of compound **3**

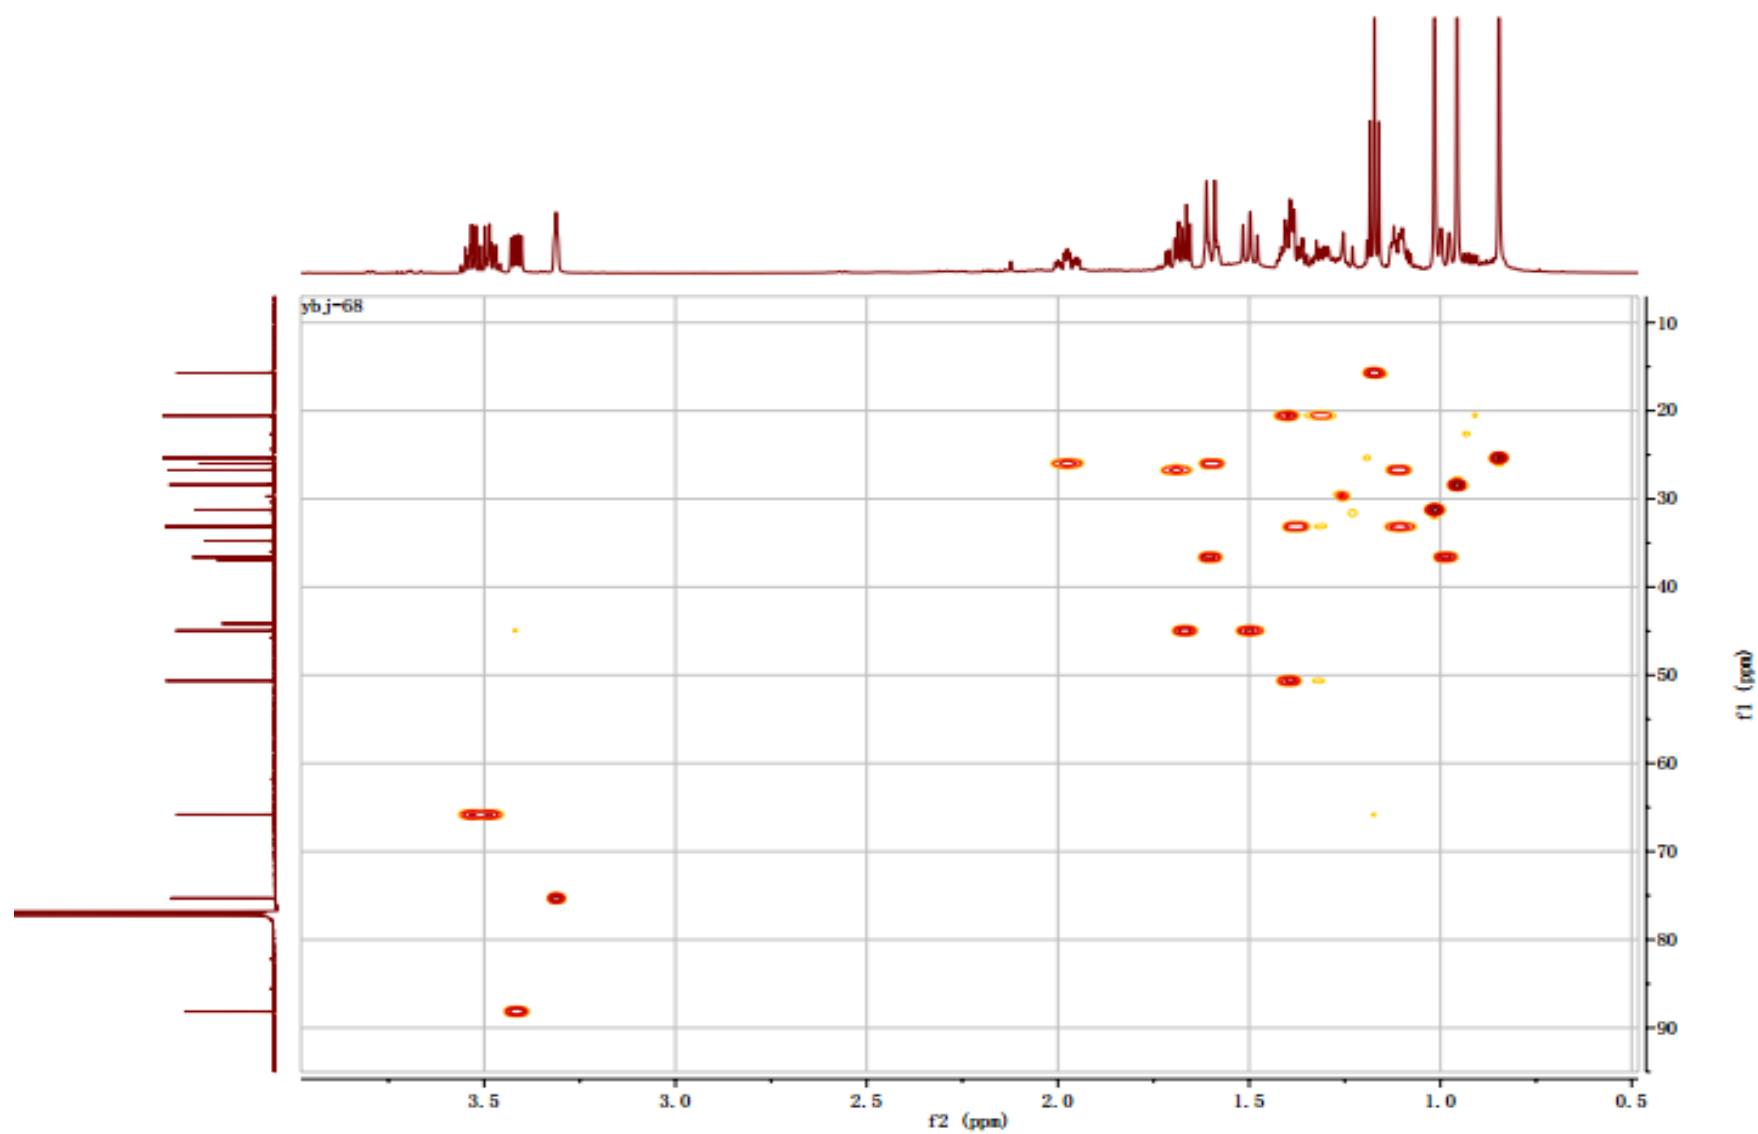

The HMBC spectrum of compound 3

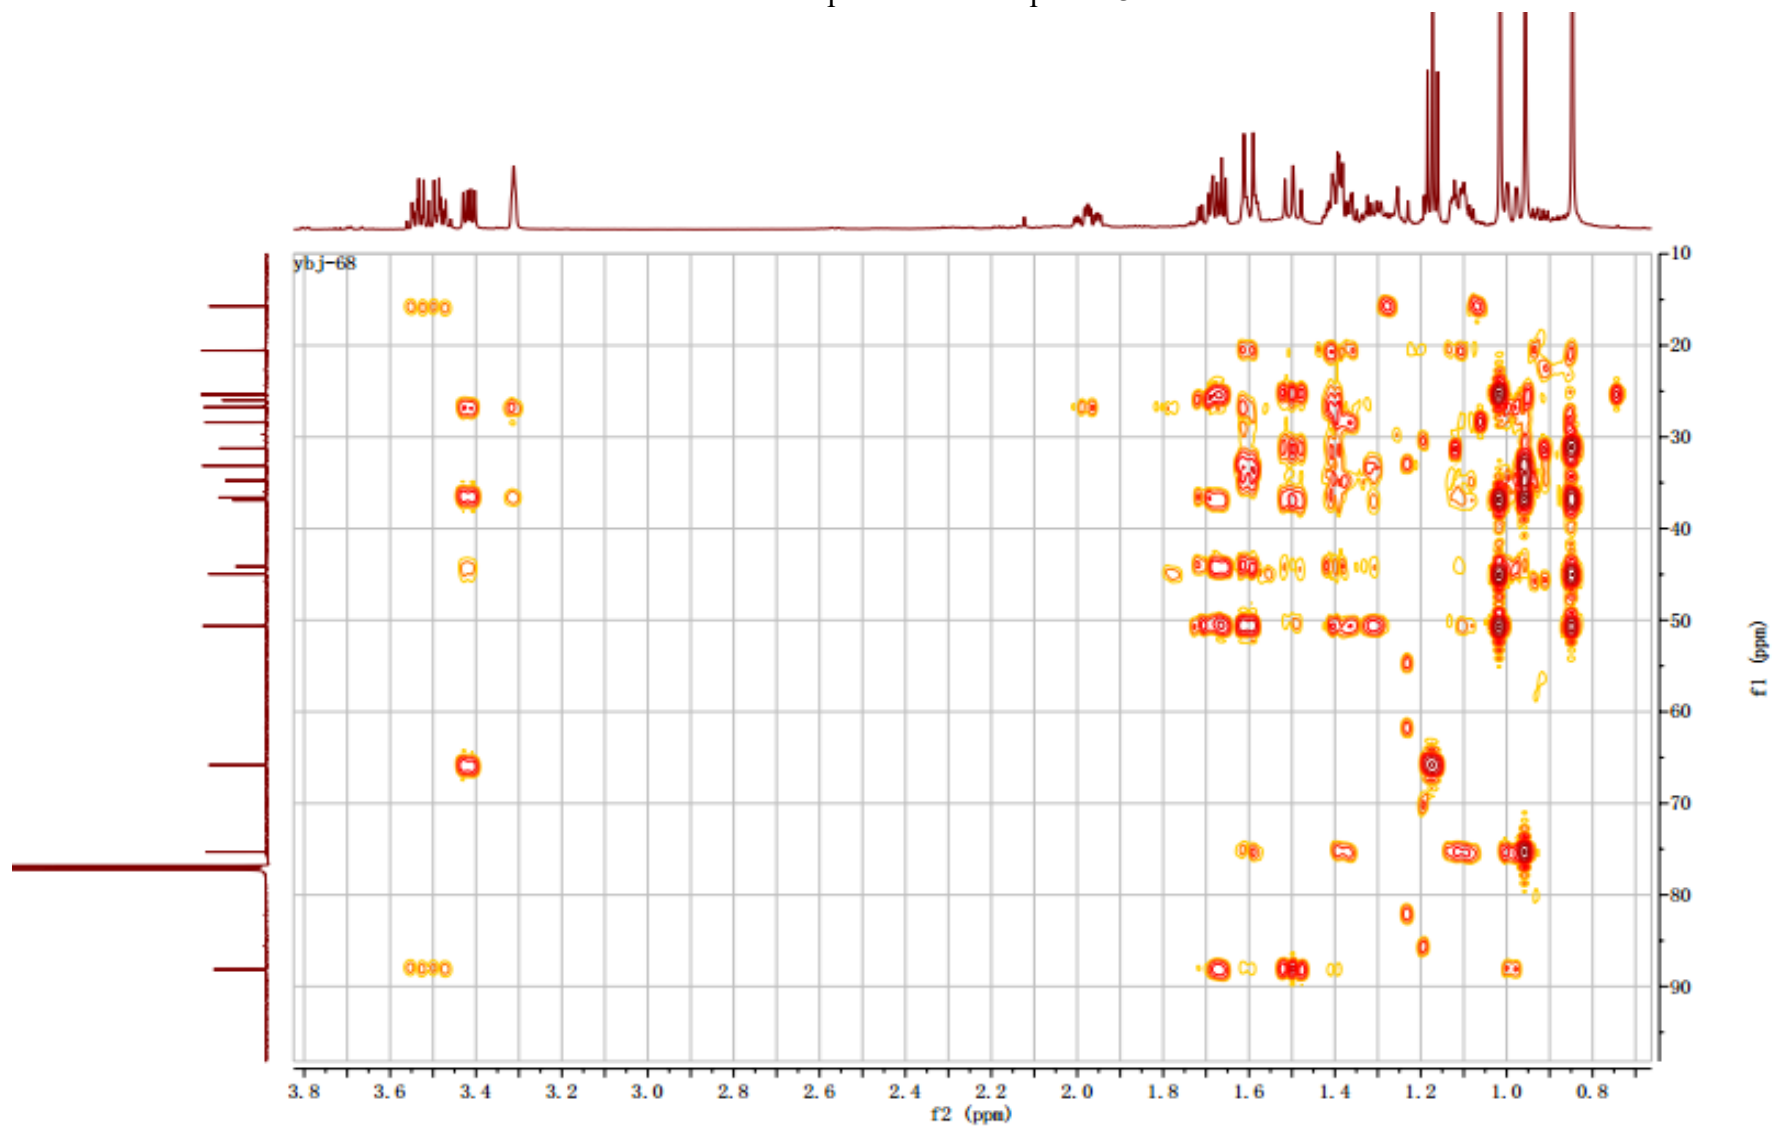

The COSY spectrum of compound **3**

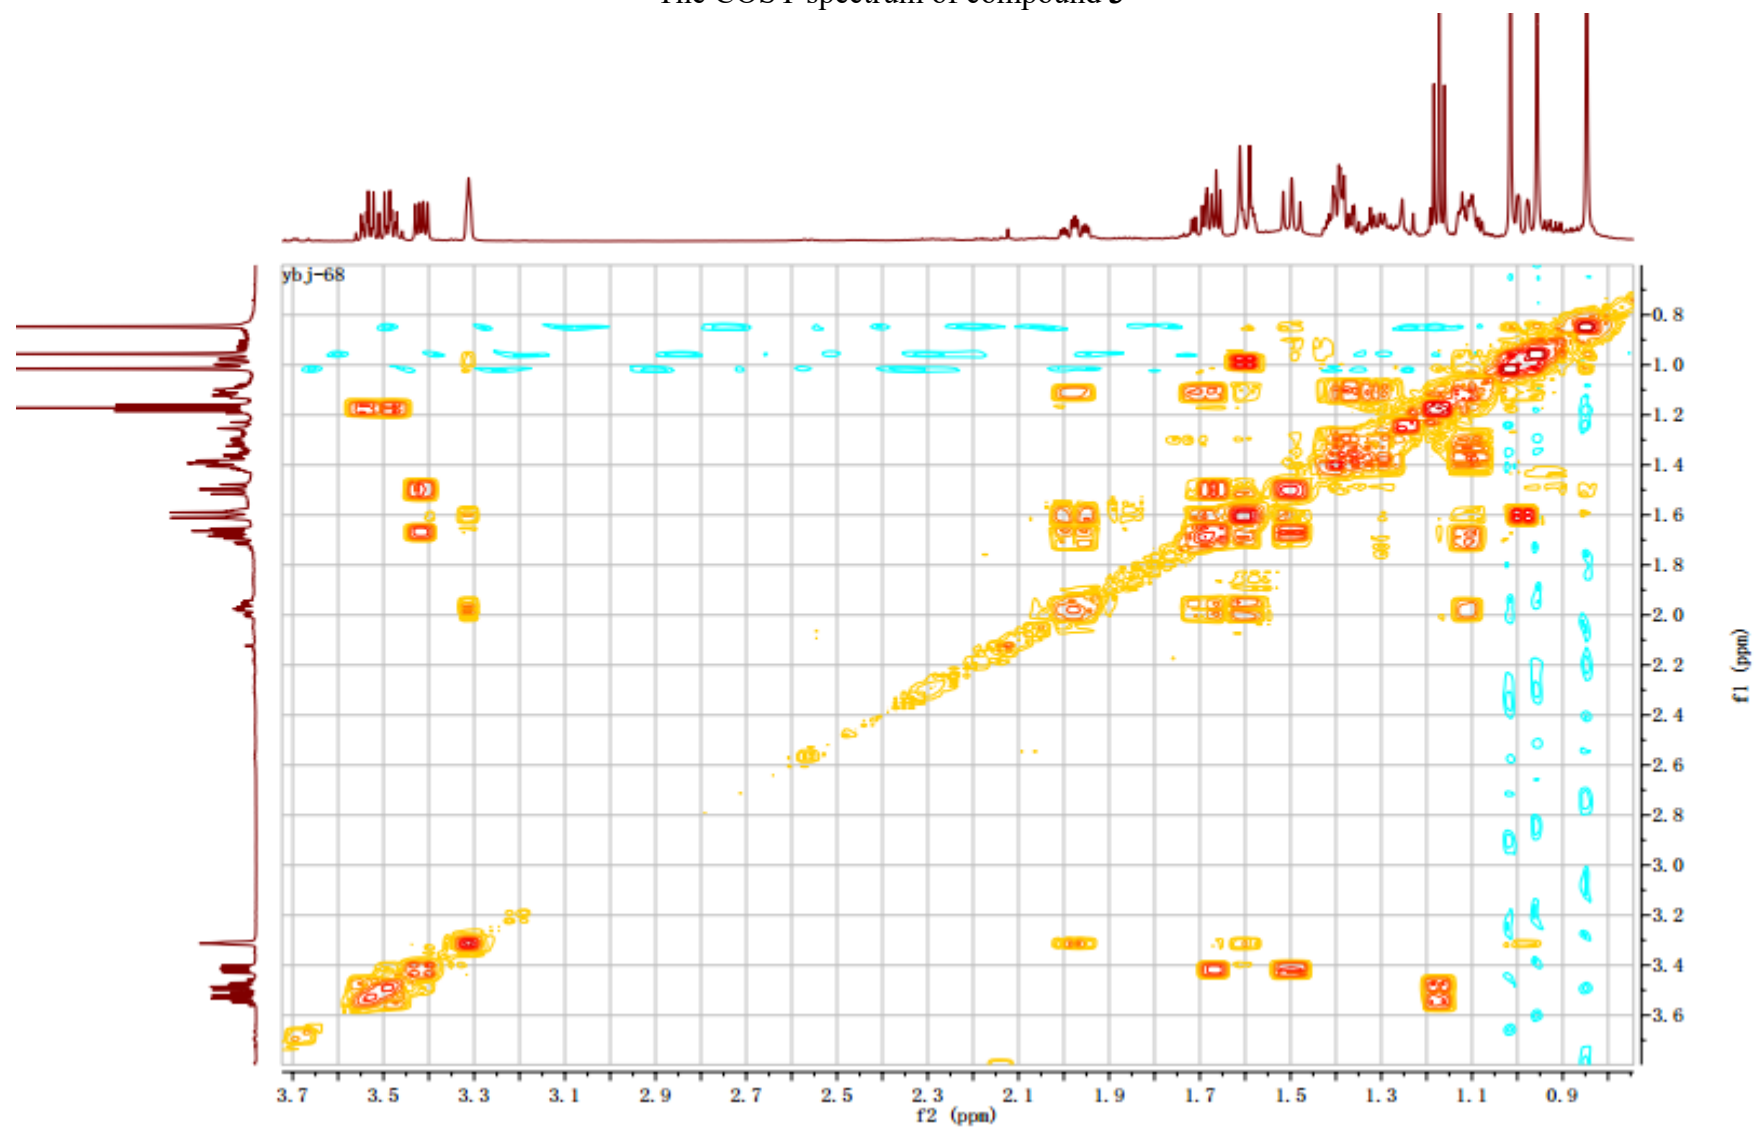

The ROESY spectrum of compound 3

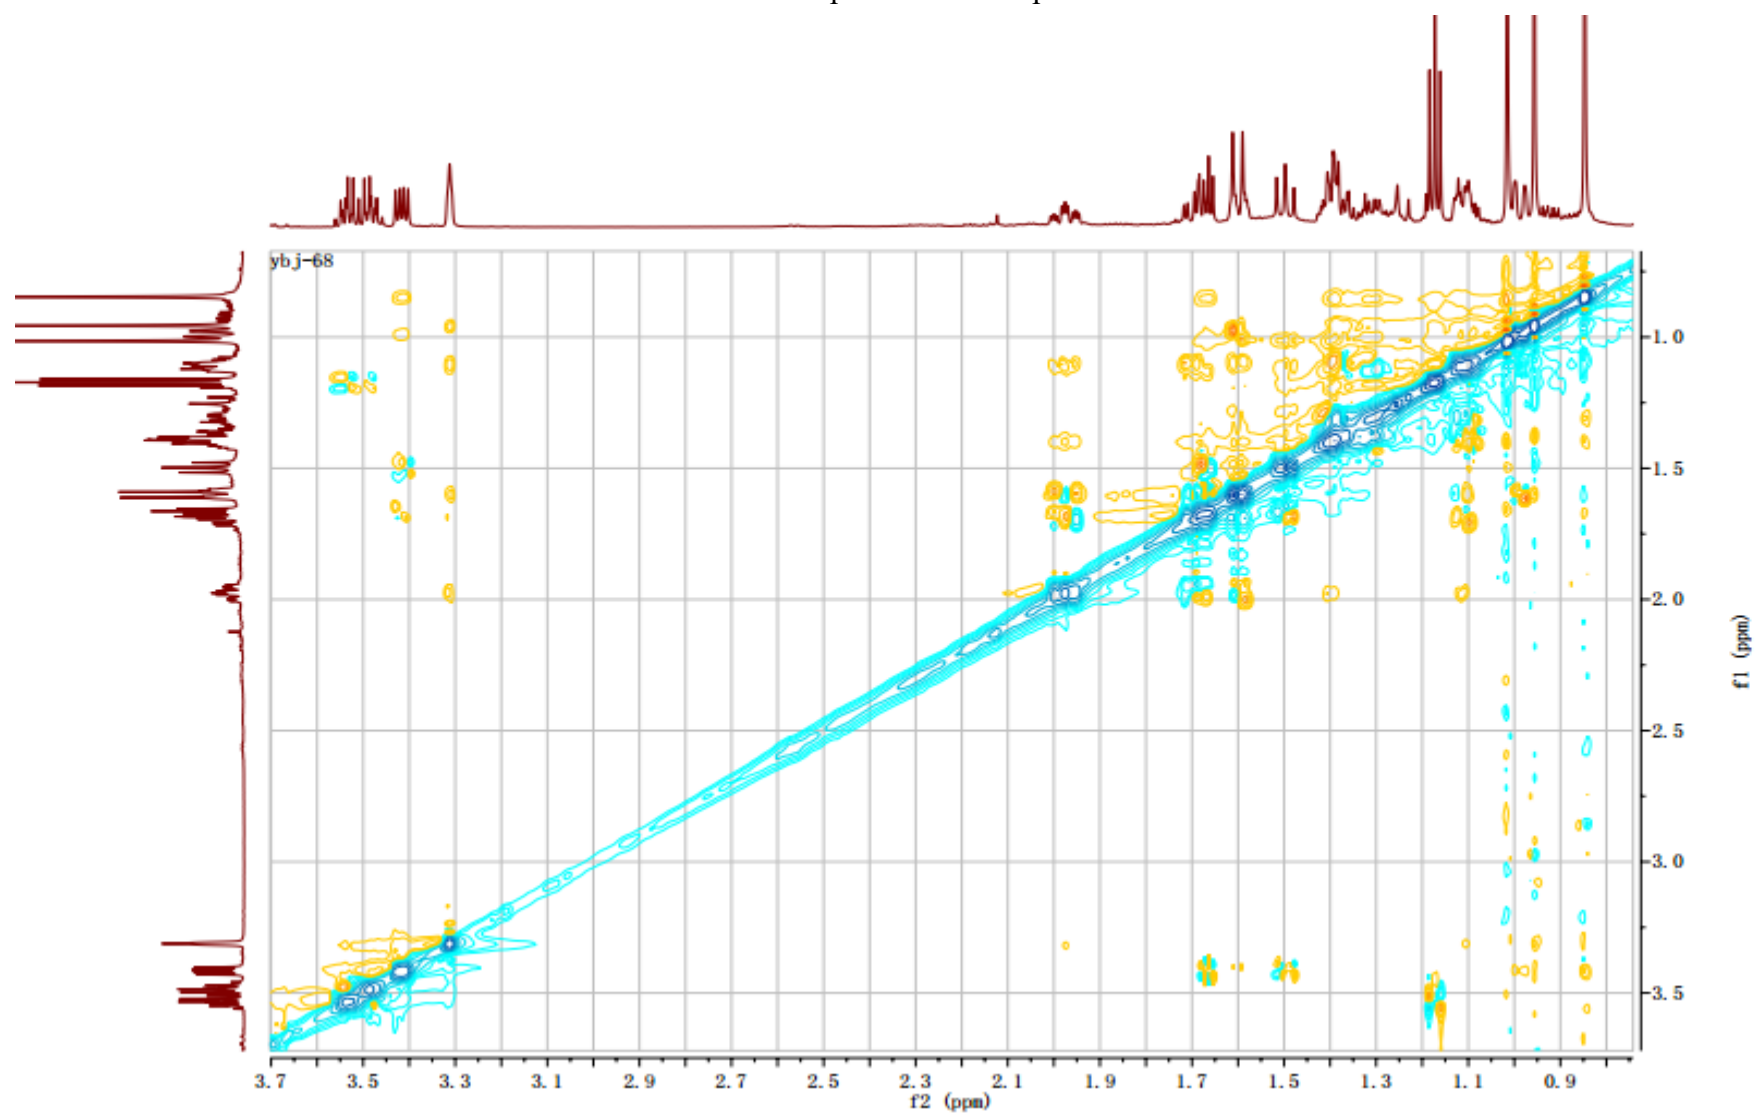

Data File: E:\DATA\2021\1011\YBJ-68.Jcd

| Elmt | Val. | Min | Max | Elmt | Val. | Min | Max | Elmt | Val. | Min | Max | Use Adduct |
|------|------|-----|-----|------|------|-----|-----|------|------|-----|-----|------------|
| H    | 1    | 5   | 100 | F    | 1    | 0   | 0   | Cl   | 1    | 0   | 0   |            |
| 2H   | 1    | 0   | 0   | Na   | 1    | 0   | 0   | Co   | 2    | 0   | 0   |            |
| B    | 3    | 0   | 0   | Mg   | 2    | 0   | 0   | Cu   | 2    | 0   | 0   |            |
| C    | 4    | 5   | 100 | Si   | 4    | 0   | 0   | Se   | 2    | 0   | 0   |            |
| N    | 3    | 0   | 20  | P    | 3    | 0   | 0   | Br   | 1    | 0   | 0   |            |
| O    | 2    | 0   | 30  | S    | 2    | 0   | 0   | Pd   | 2    | 0   | 0   |            |

Error Margin (ppm): 5  
 DBE Range: not fixed  
 HC Ratio: unlimited  
 Apply N Rule: no  
 Max Isotopes: all  
 Isotope RI (%): 1.00  
 MSn Iso RI (%): 75.00  
 MSn Logic Mode: OR  
 Electron Ions: both  
 Use MSn Info: yes  
 Isotope Res: 10000  
 Max Results: 20

Event#: 1 MS(E+) Ret. Time : 0.373 -&gt; 0.453 Scan#: 57 -&gt; 69

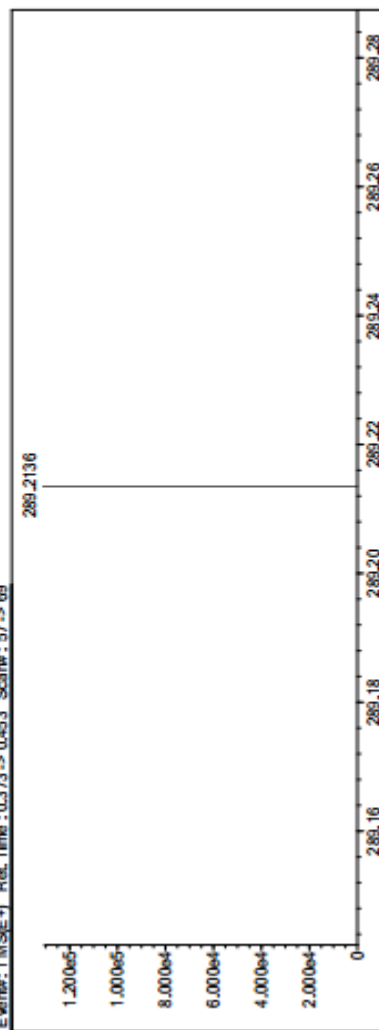

Measured region for 289.2136 m/z

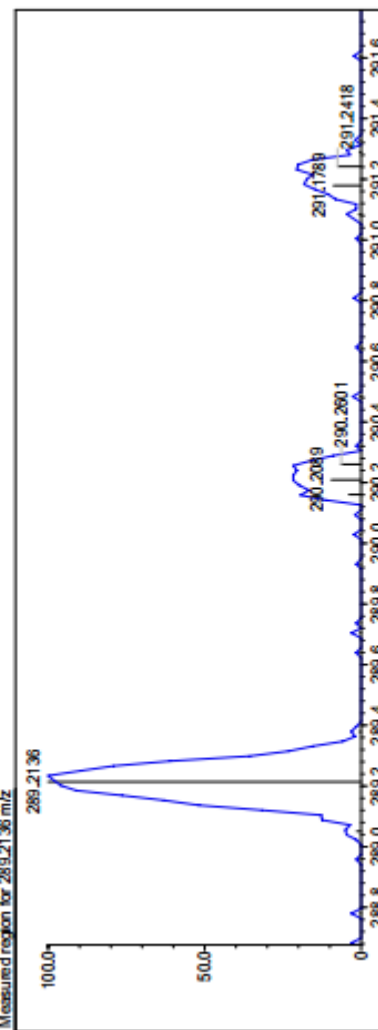C17 H30 O2 [M+Na]<sup>+</sup> : Predicted region for 289.2138 m/z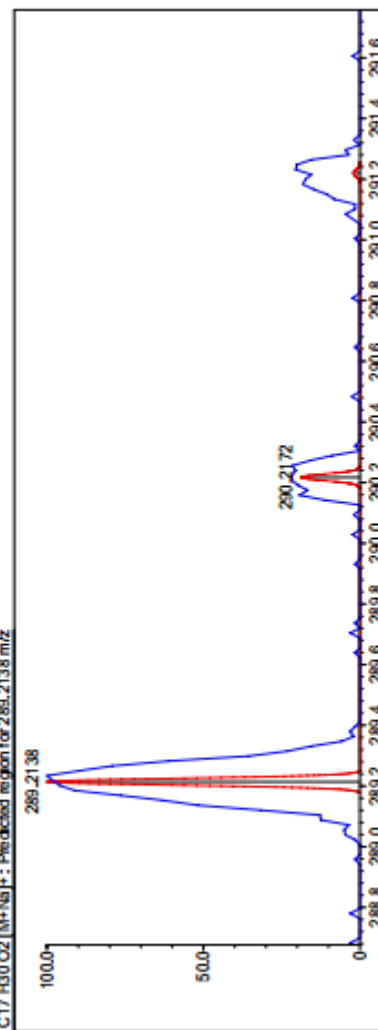

| Formula (M) | Ion                 | Mass. m/z | Pred. m/z | Df. (mDa) | Df. (ppm) | DBE |
|-------------|---------------------|-----------|-----------|-----------|-----------|-----|
| C17 H30 O2  | [M+Na] <sup>+</sup> | 289.2136  | 289.2138  | -0.2      | -0.69     | 3.0 |

The IR (KBr) spectrum of compound **3**

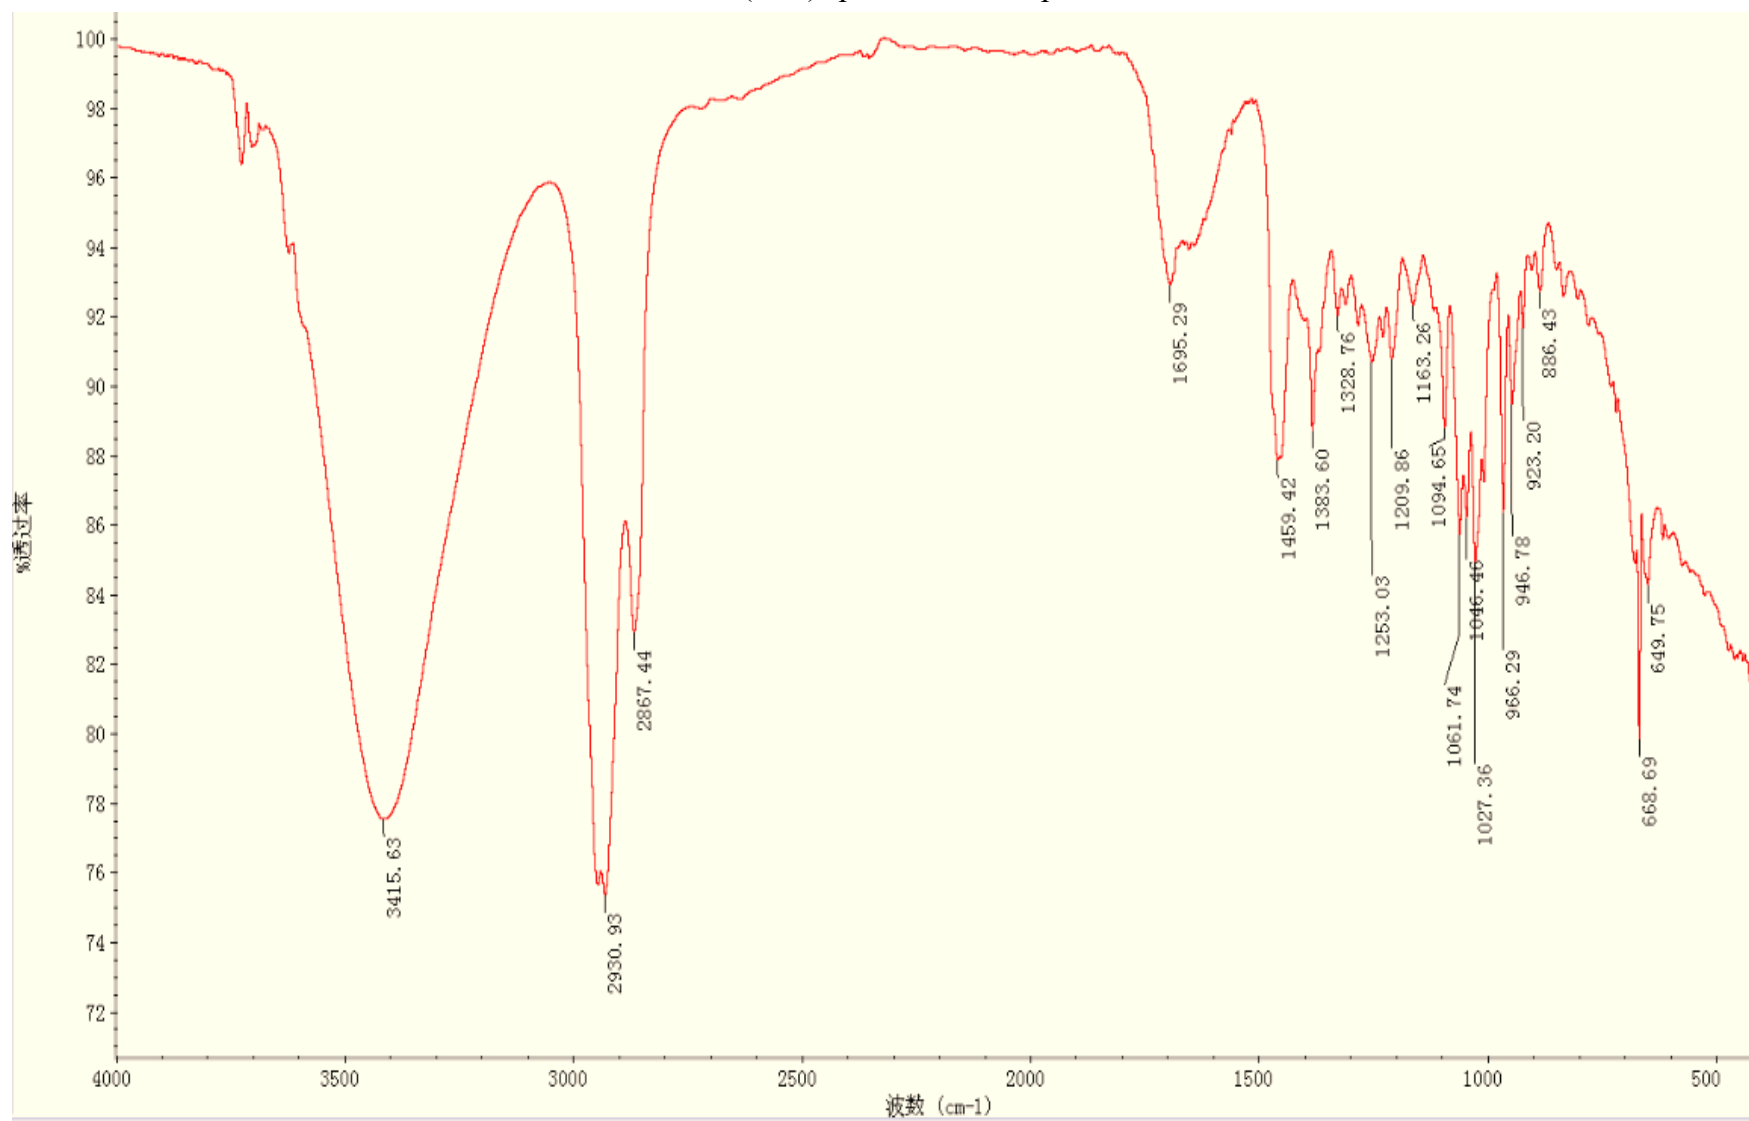



The UV spectrum of compound 3

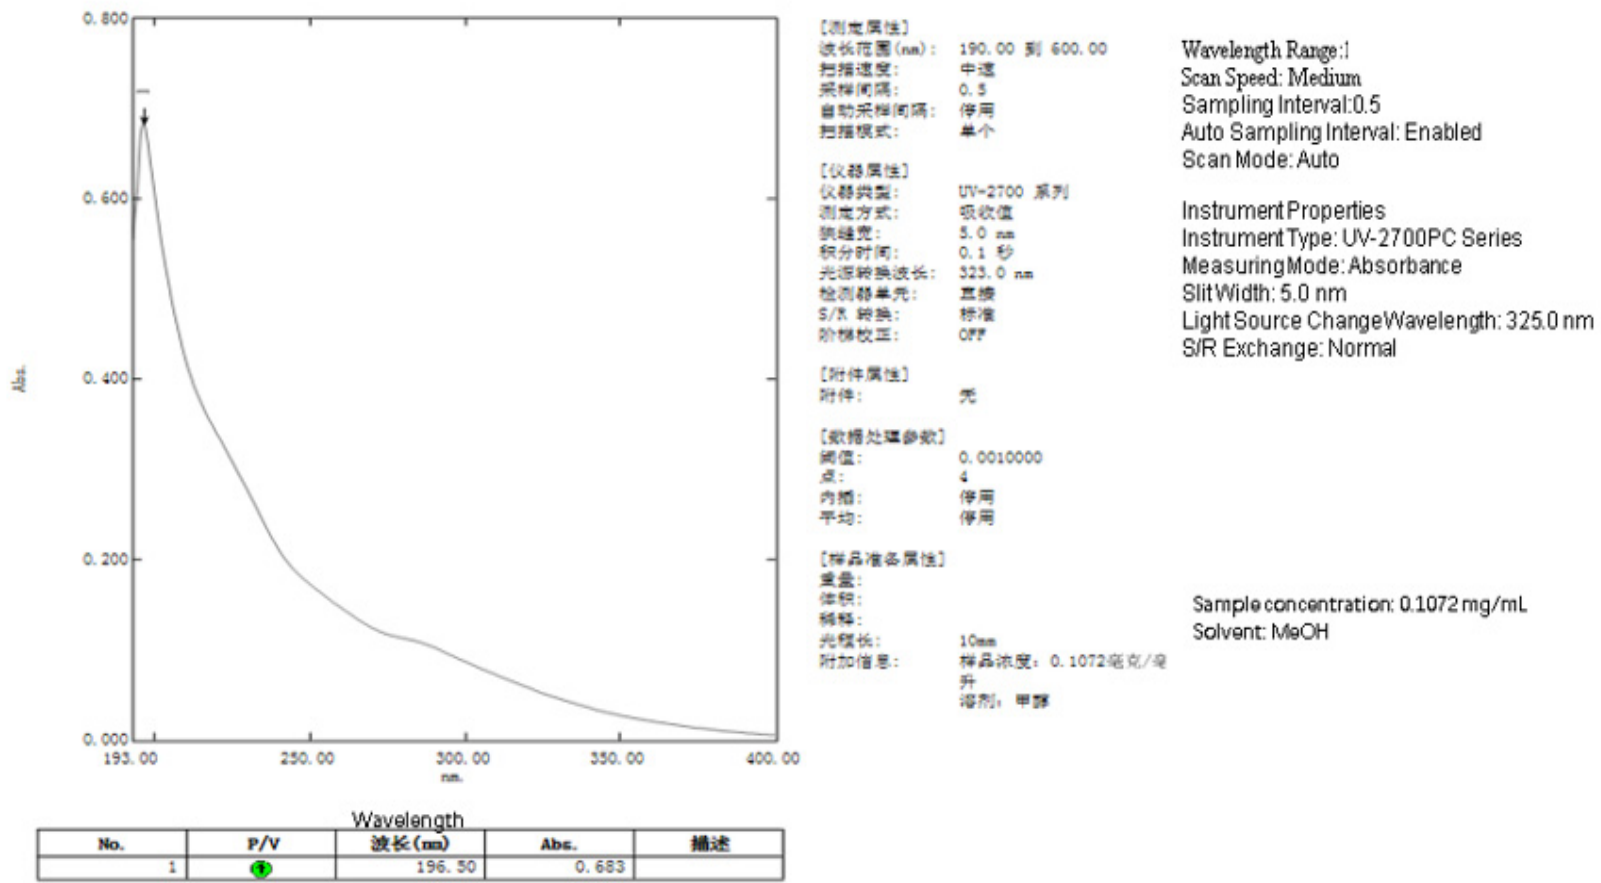

The  $^1\text{H}$  NMR spectrum of compound **5**

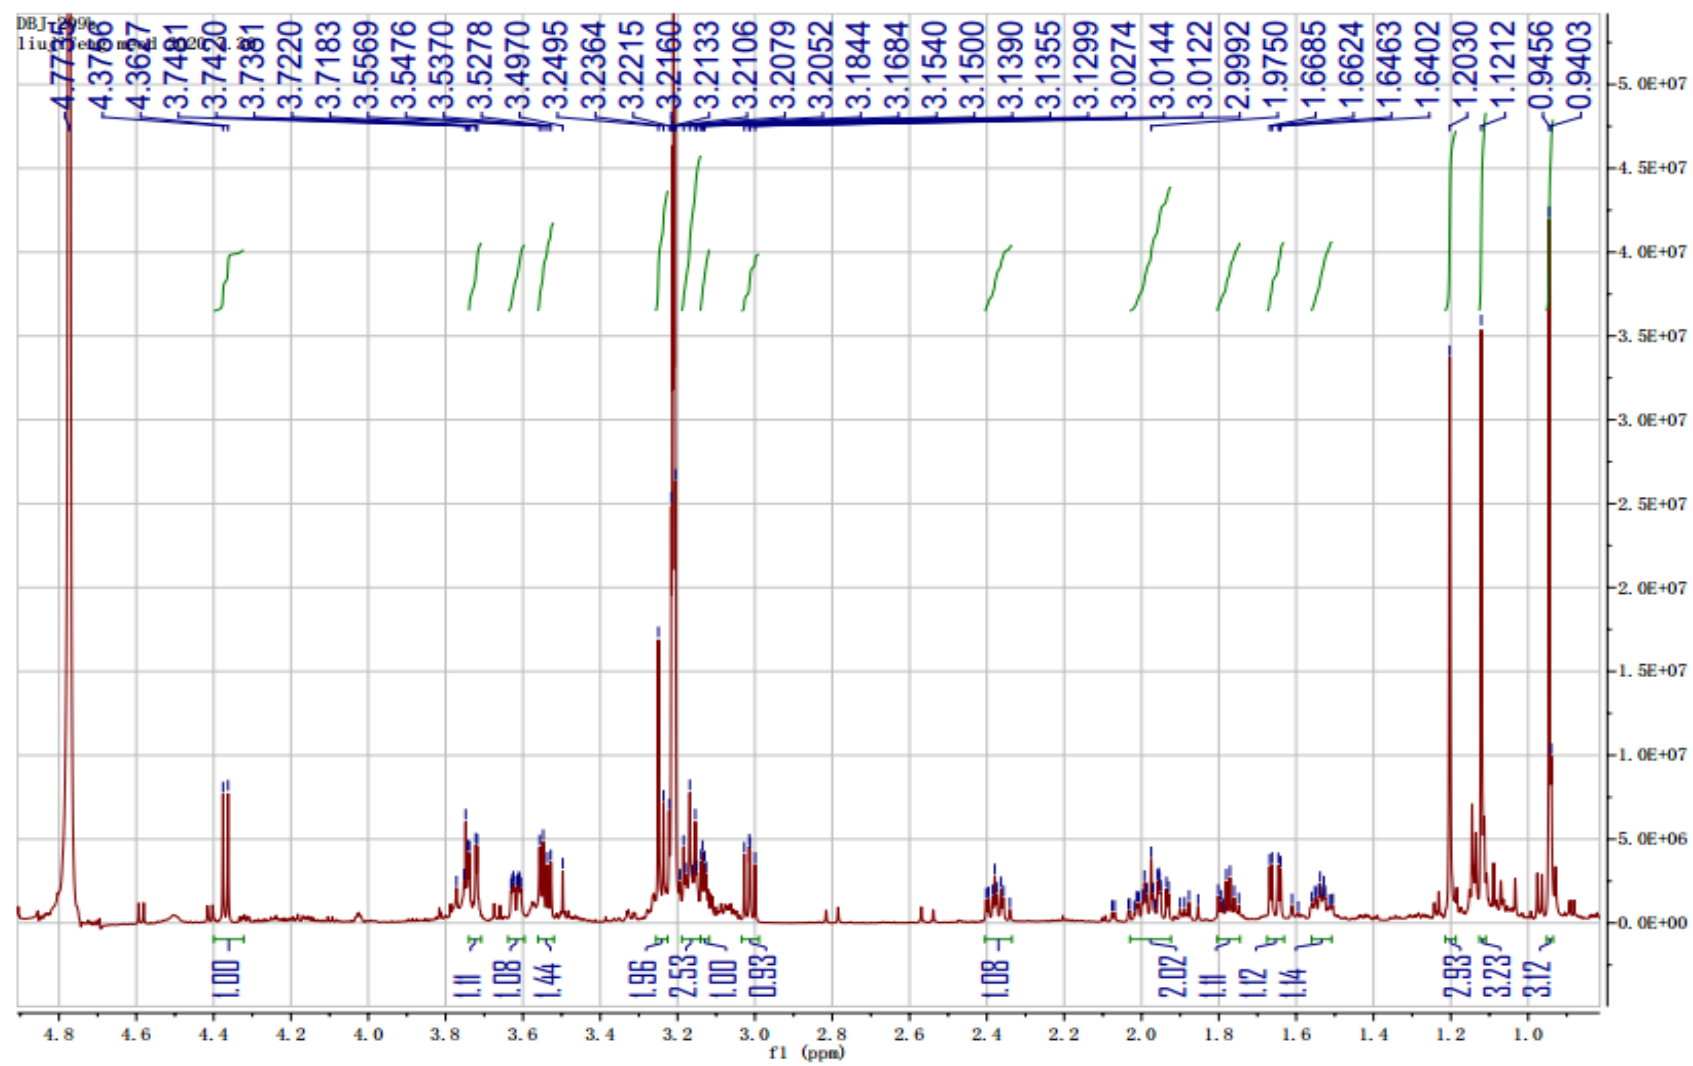

The  $^{13}\text{C}$  NMR spectrum of compound **5**

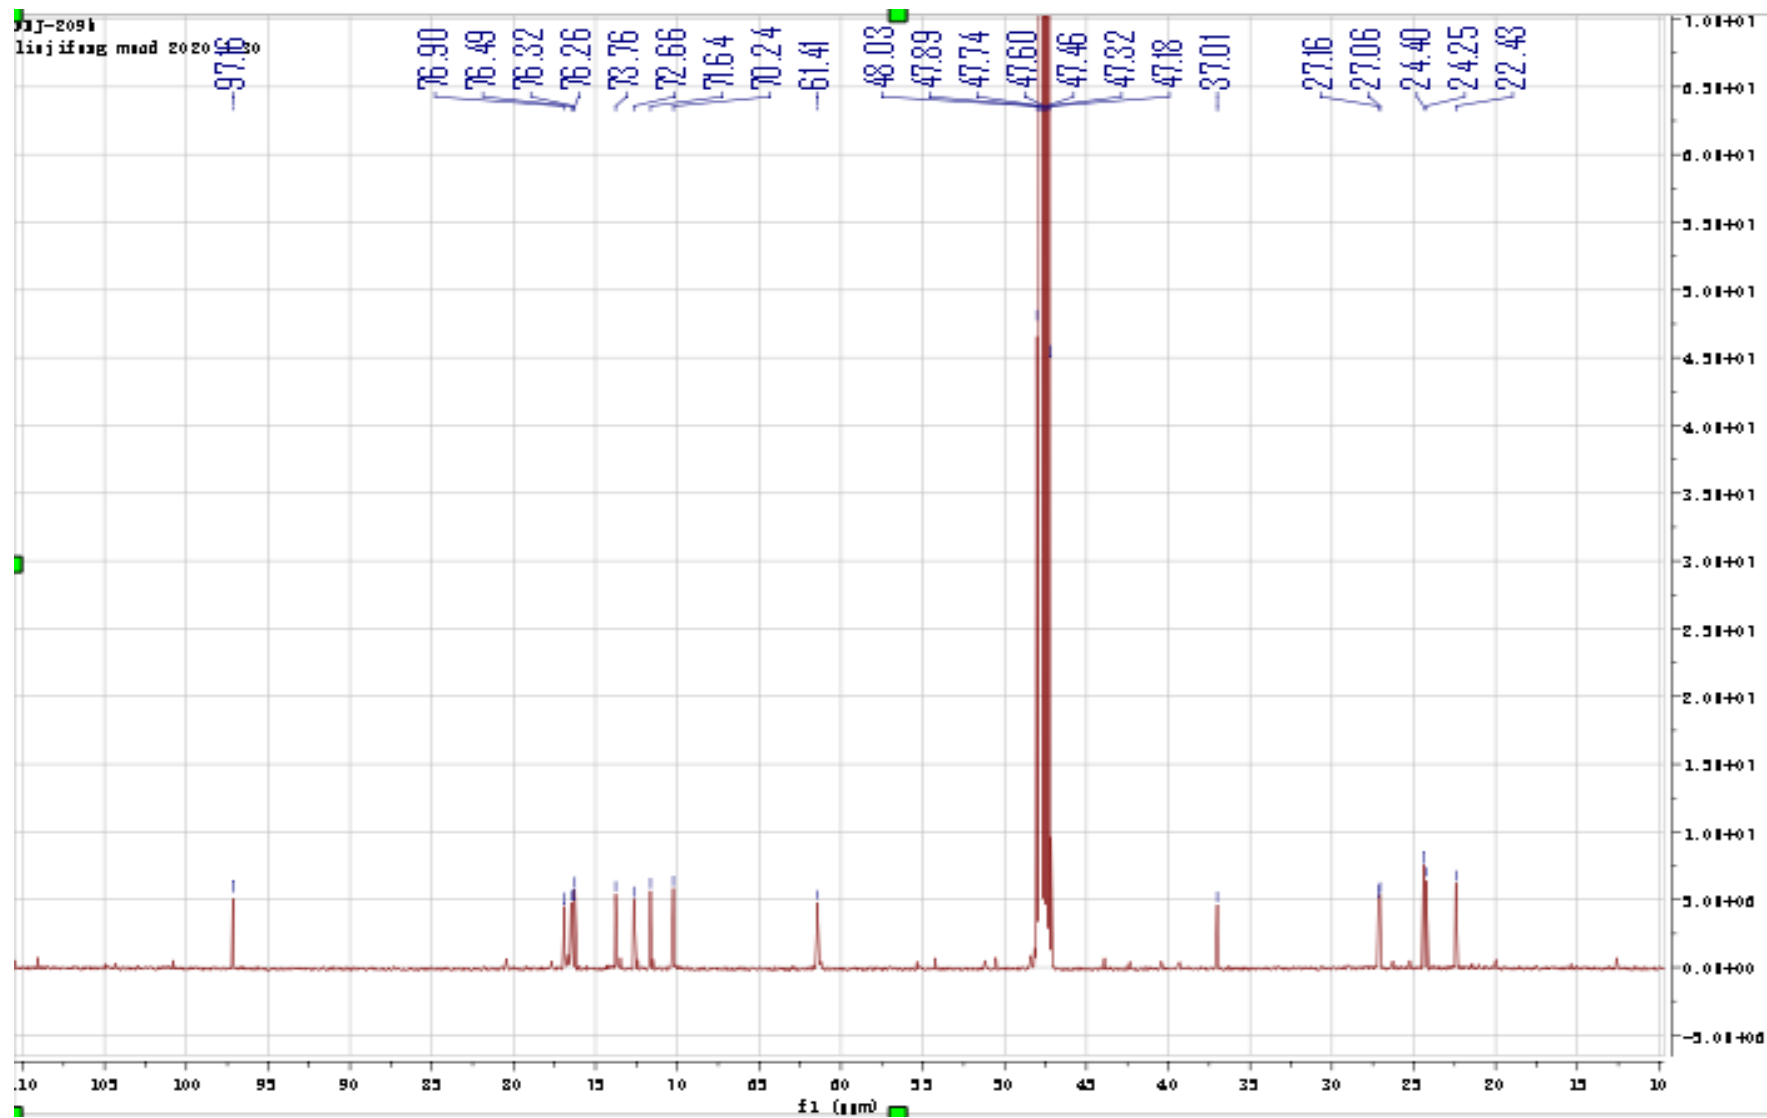

The DEPT-135 spectrum of compound **5**

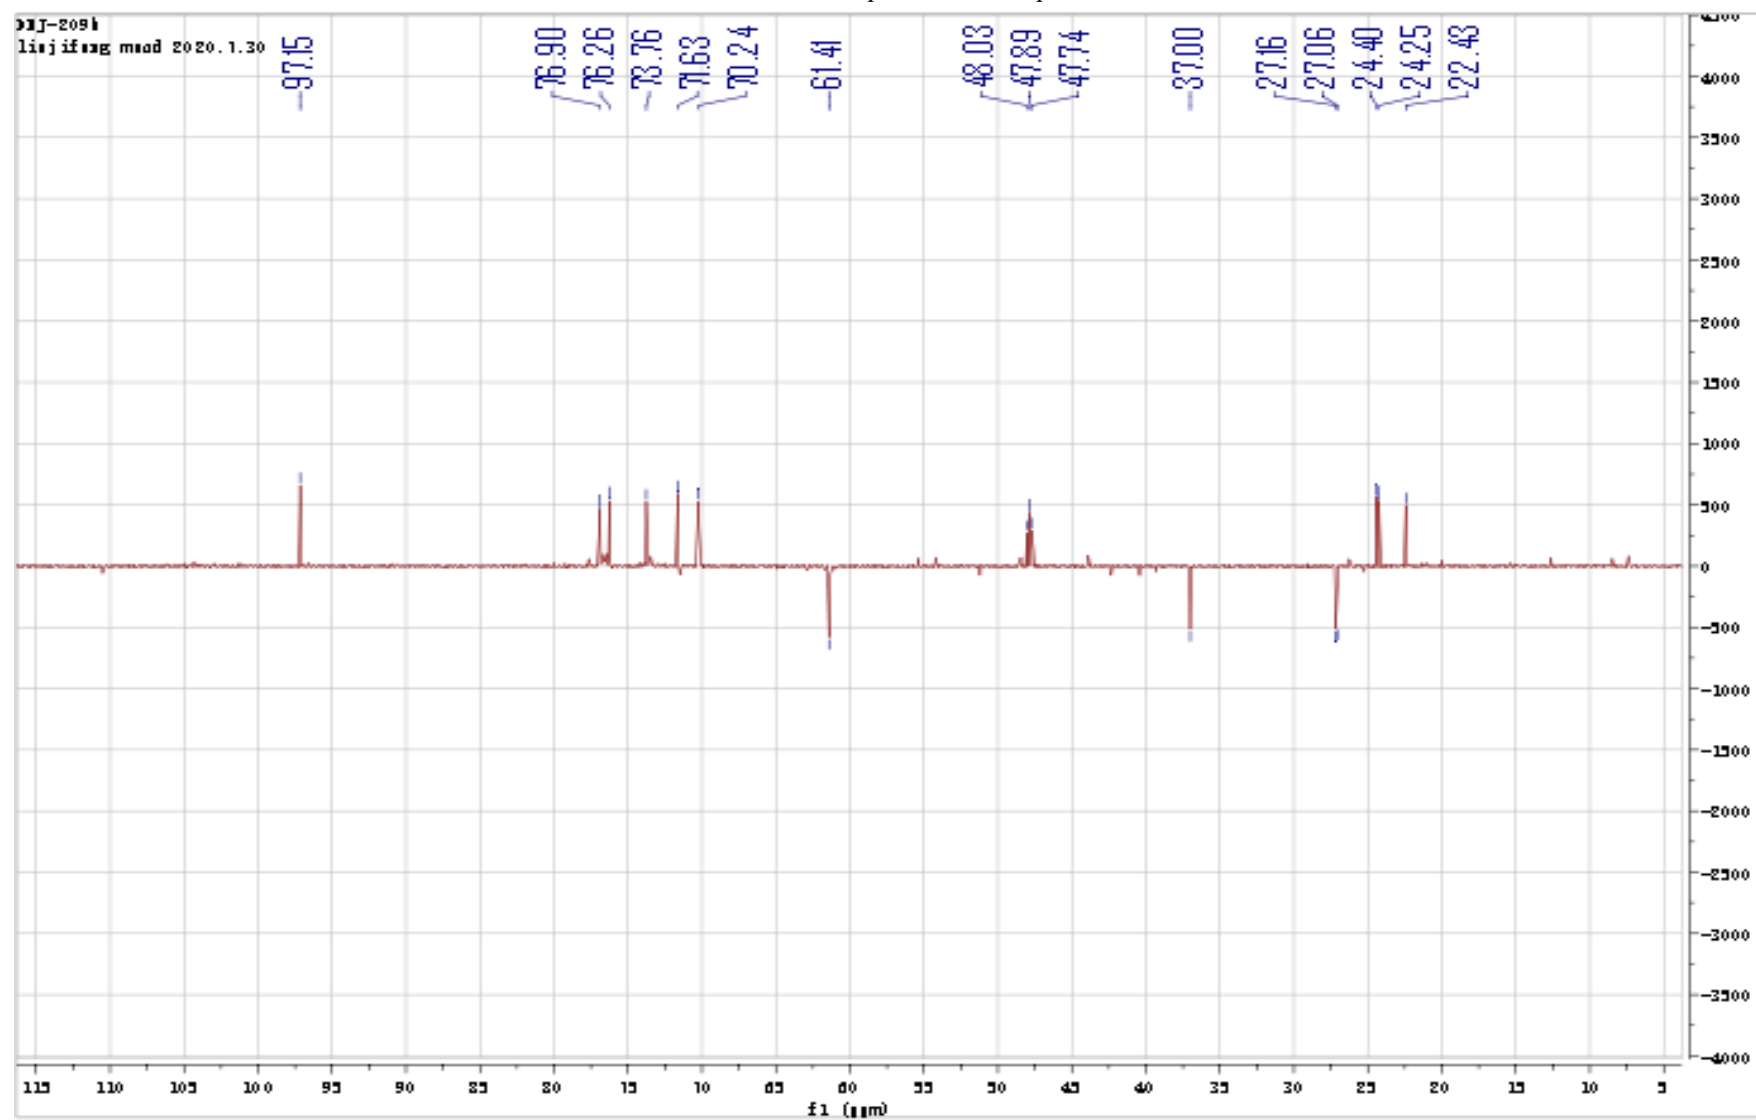

The DEPT-90 spectrum of compound 5

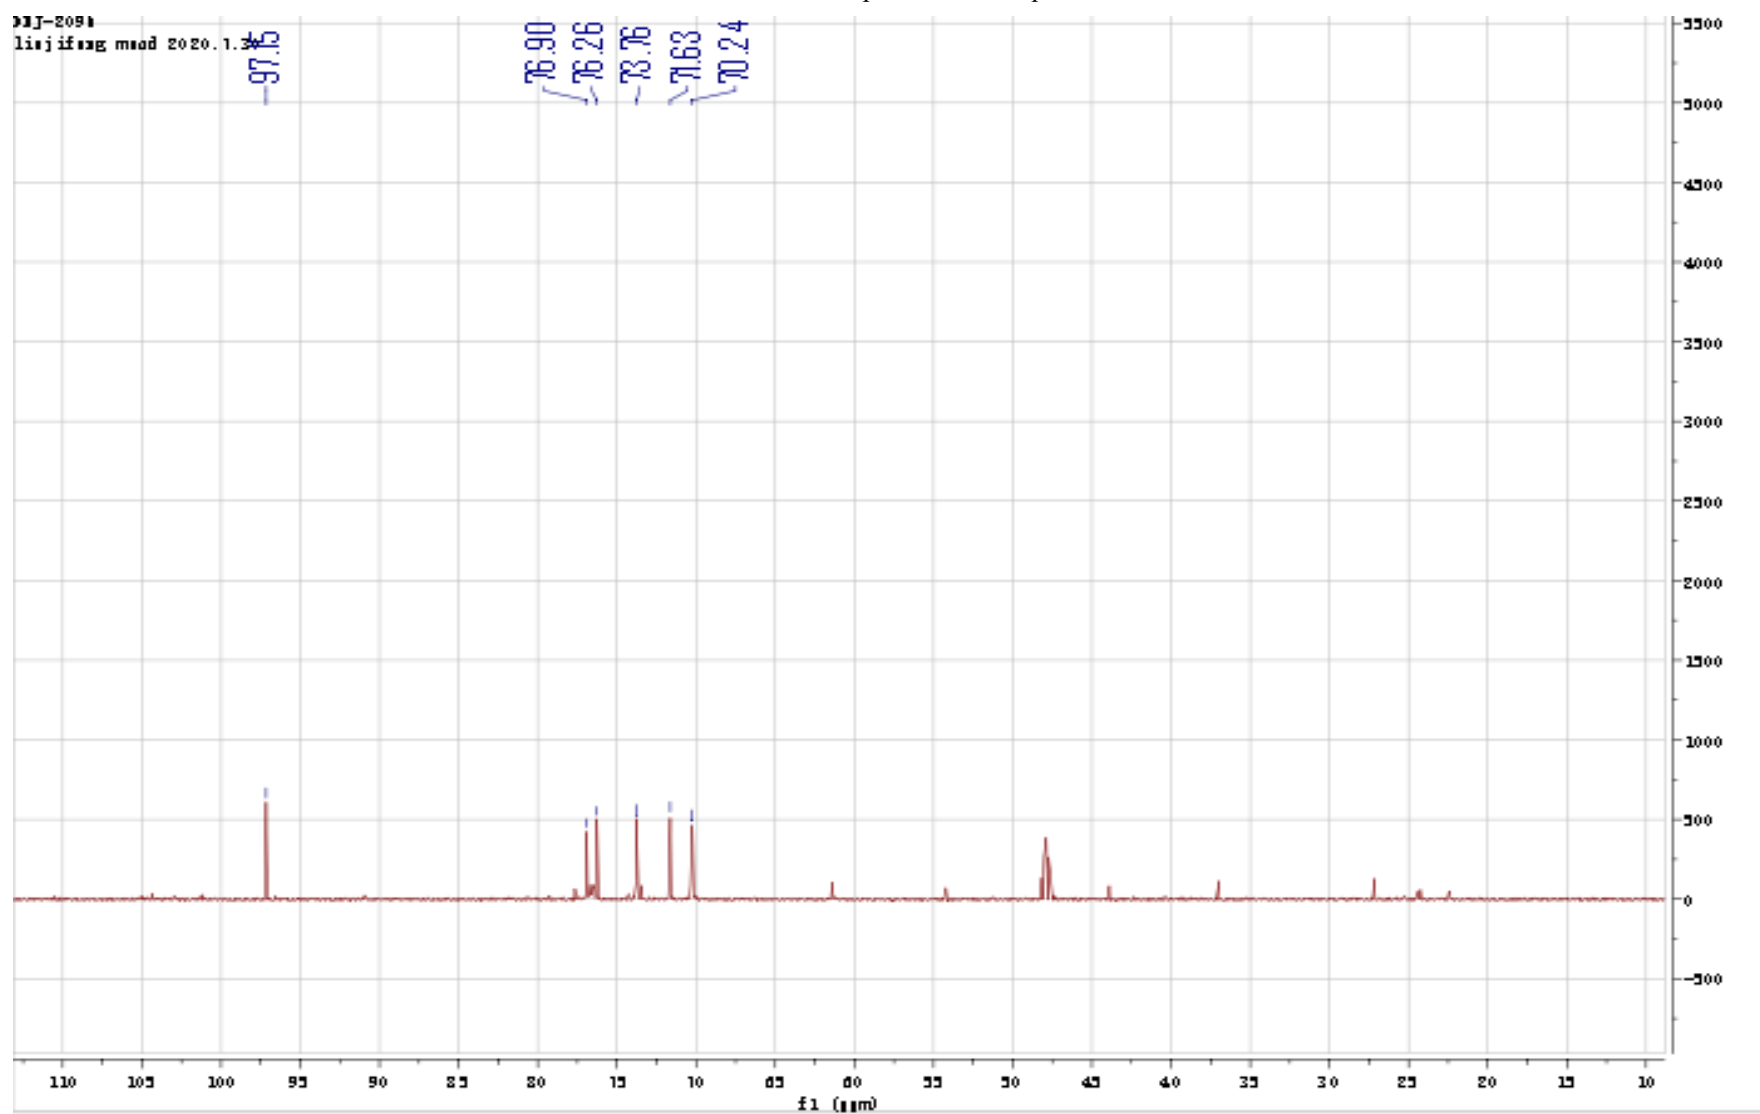

The HSQC spectrum of compound **5**

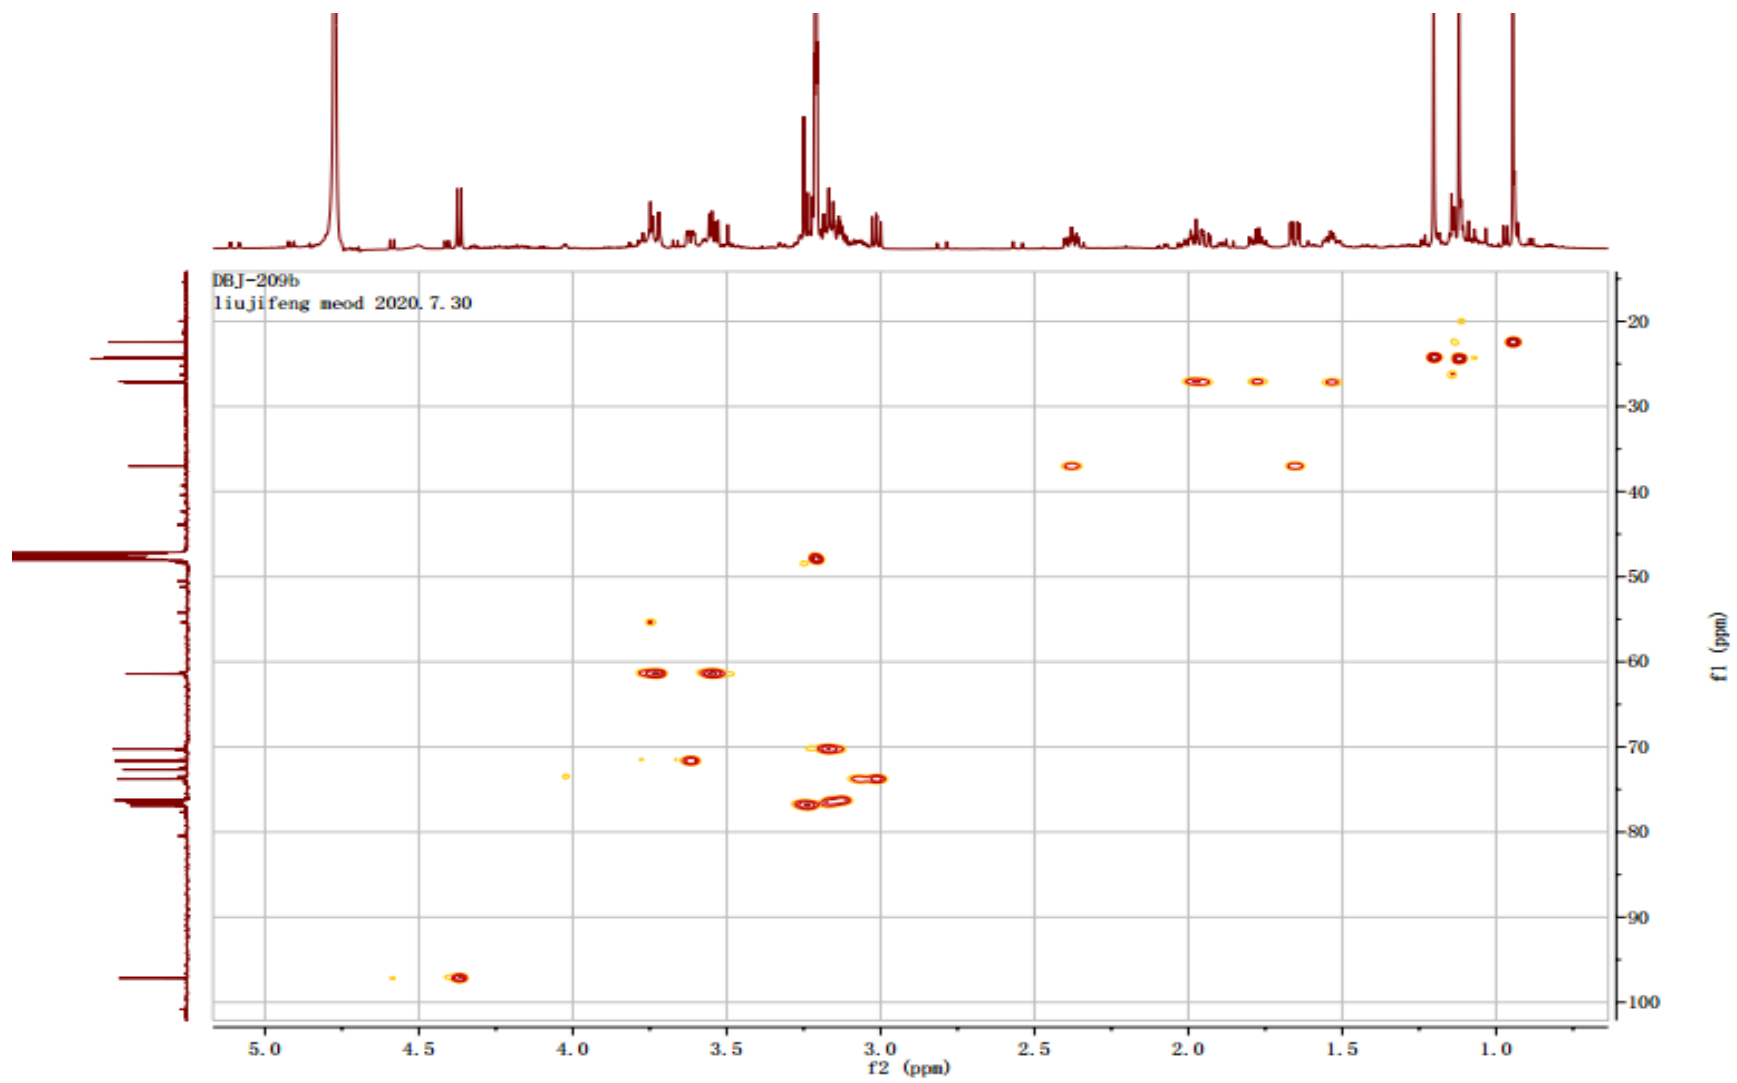

The HMBC spectrum of compound **5**

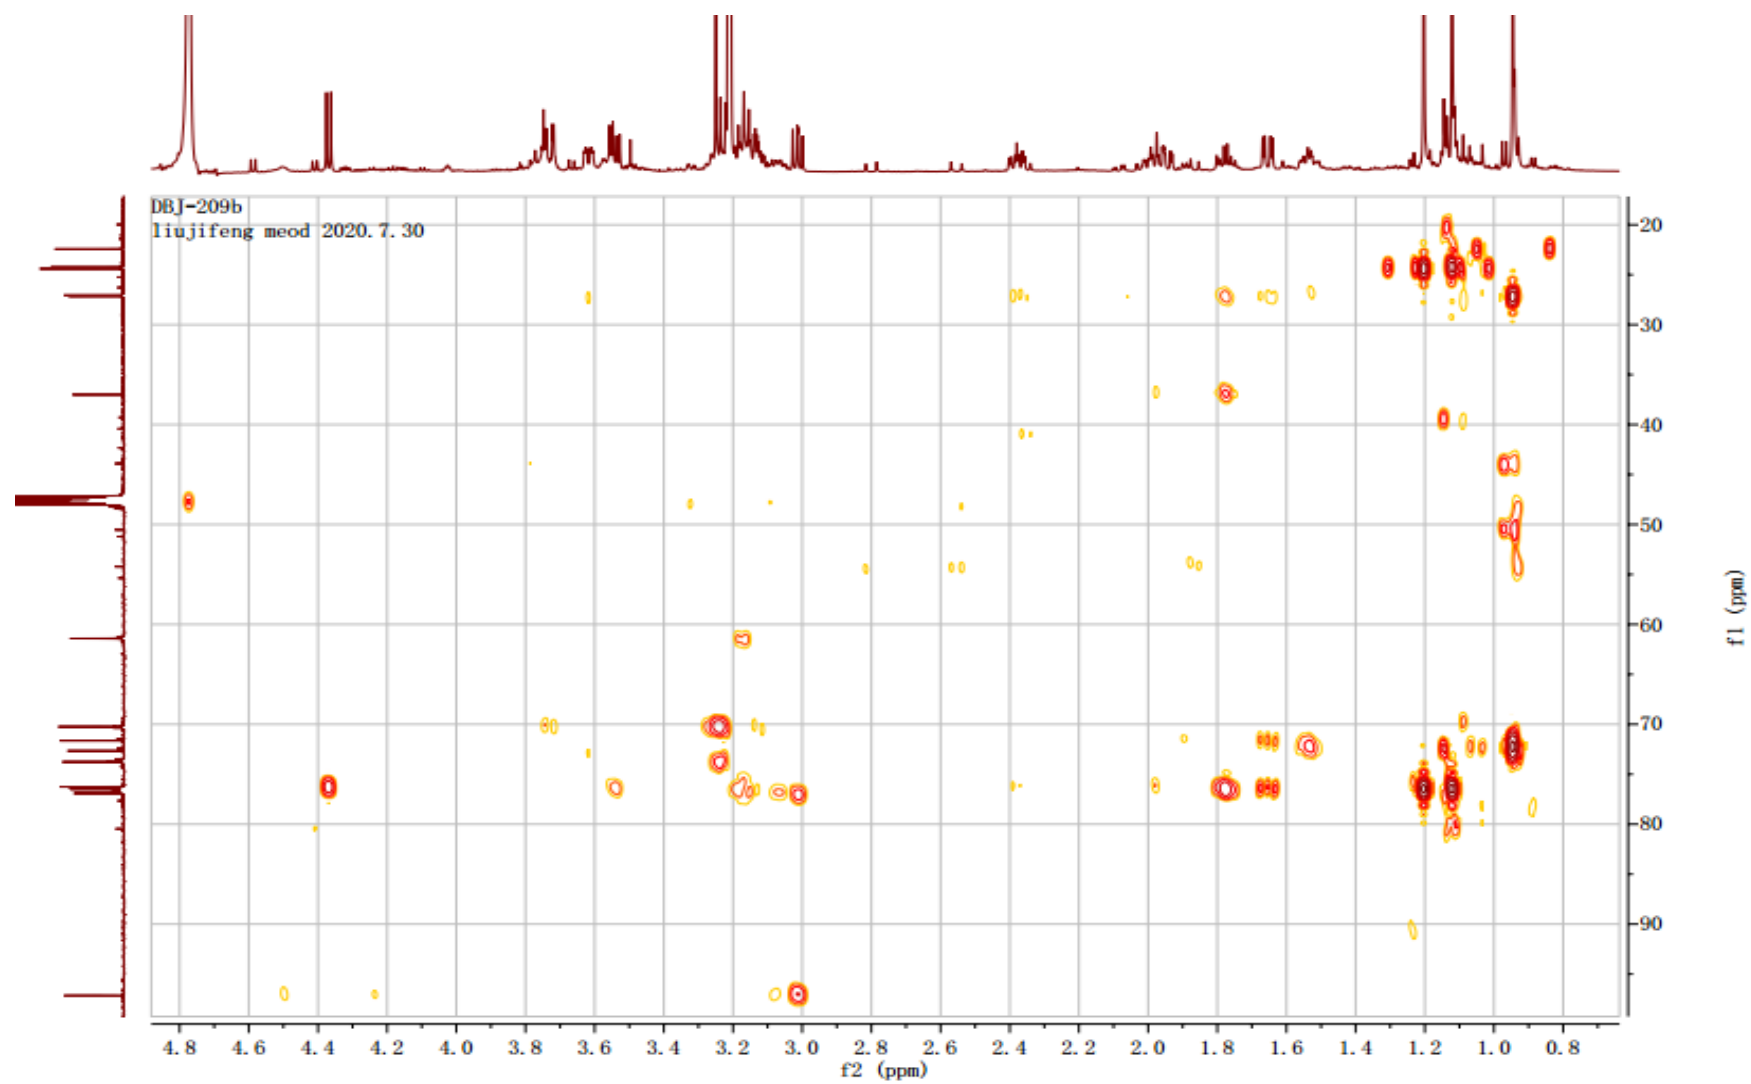

The  $^1\text{H}$ - $^1\text{H}$  COSY spectrum of compound **5**

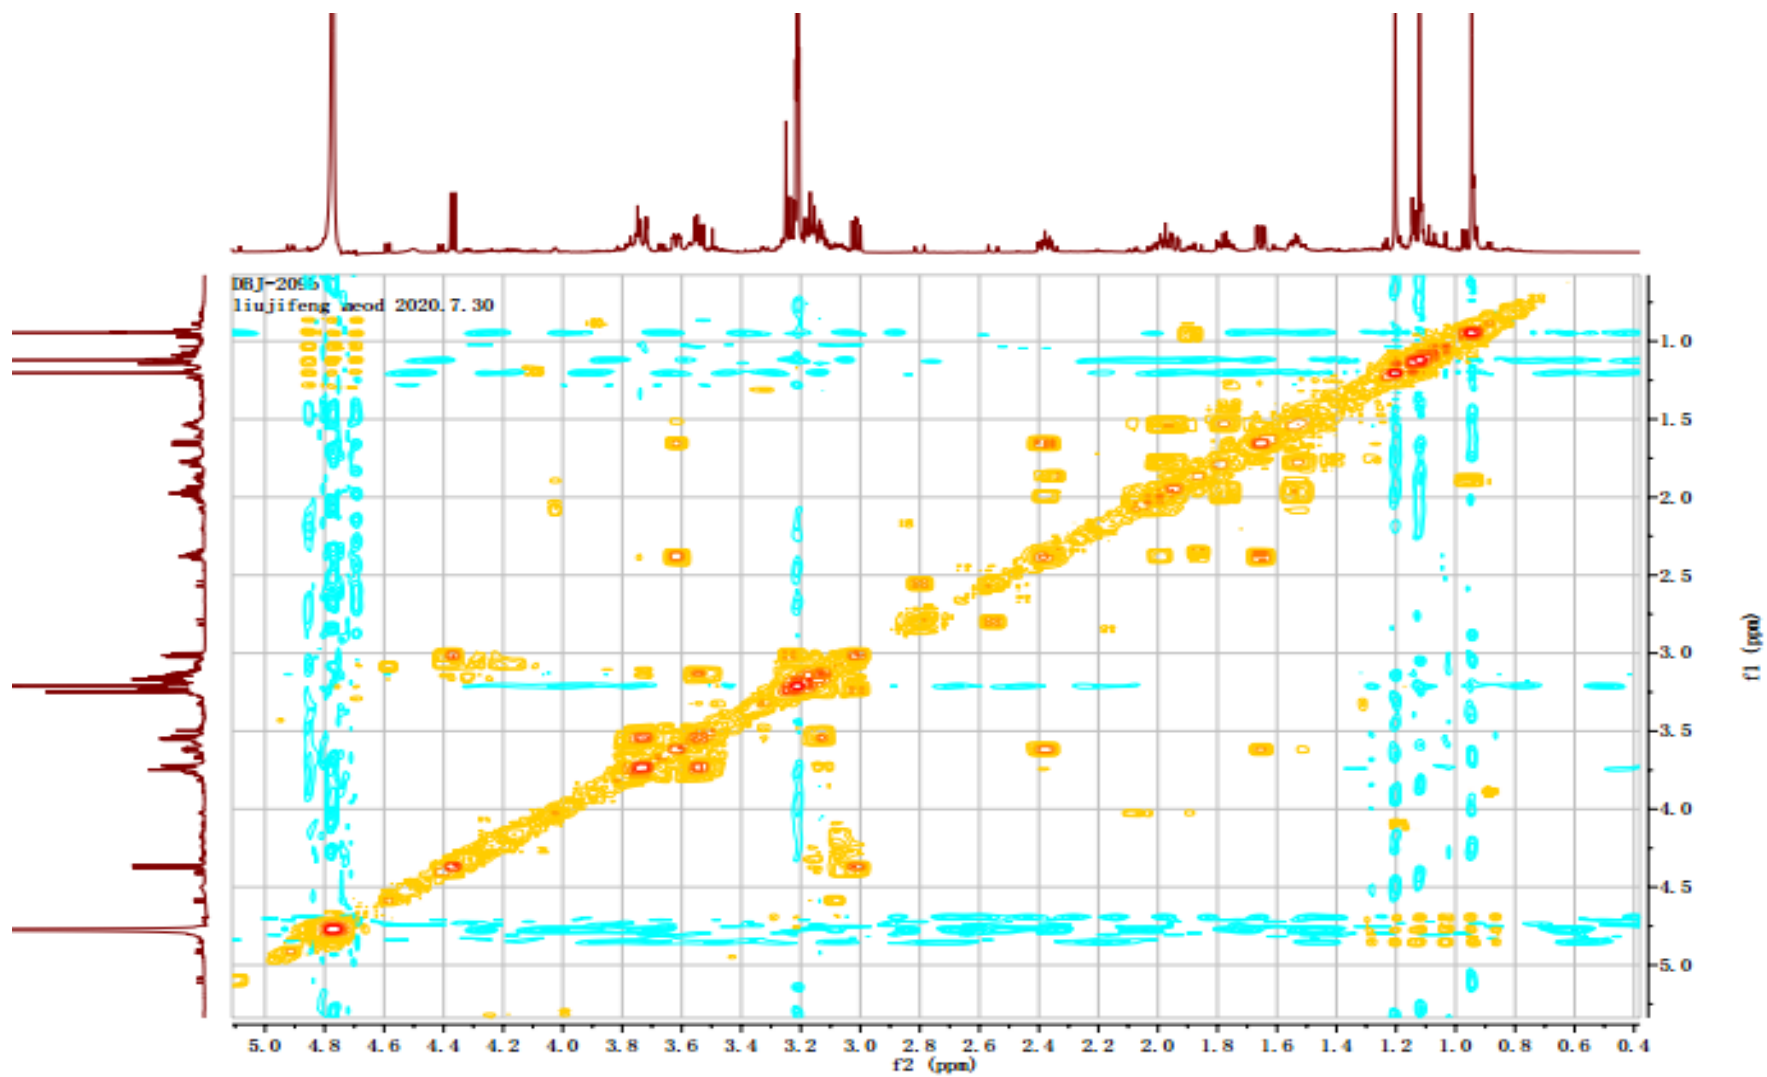



The ROESY spectrum of compound 5

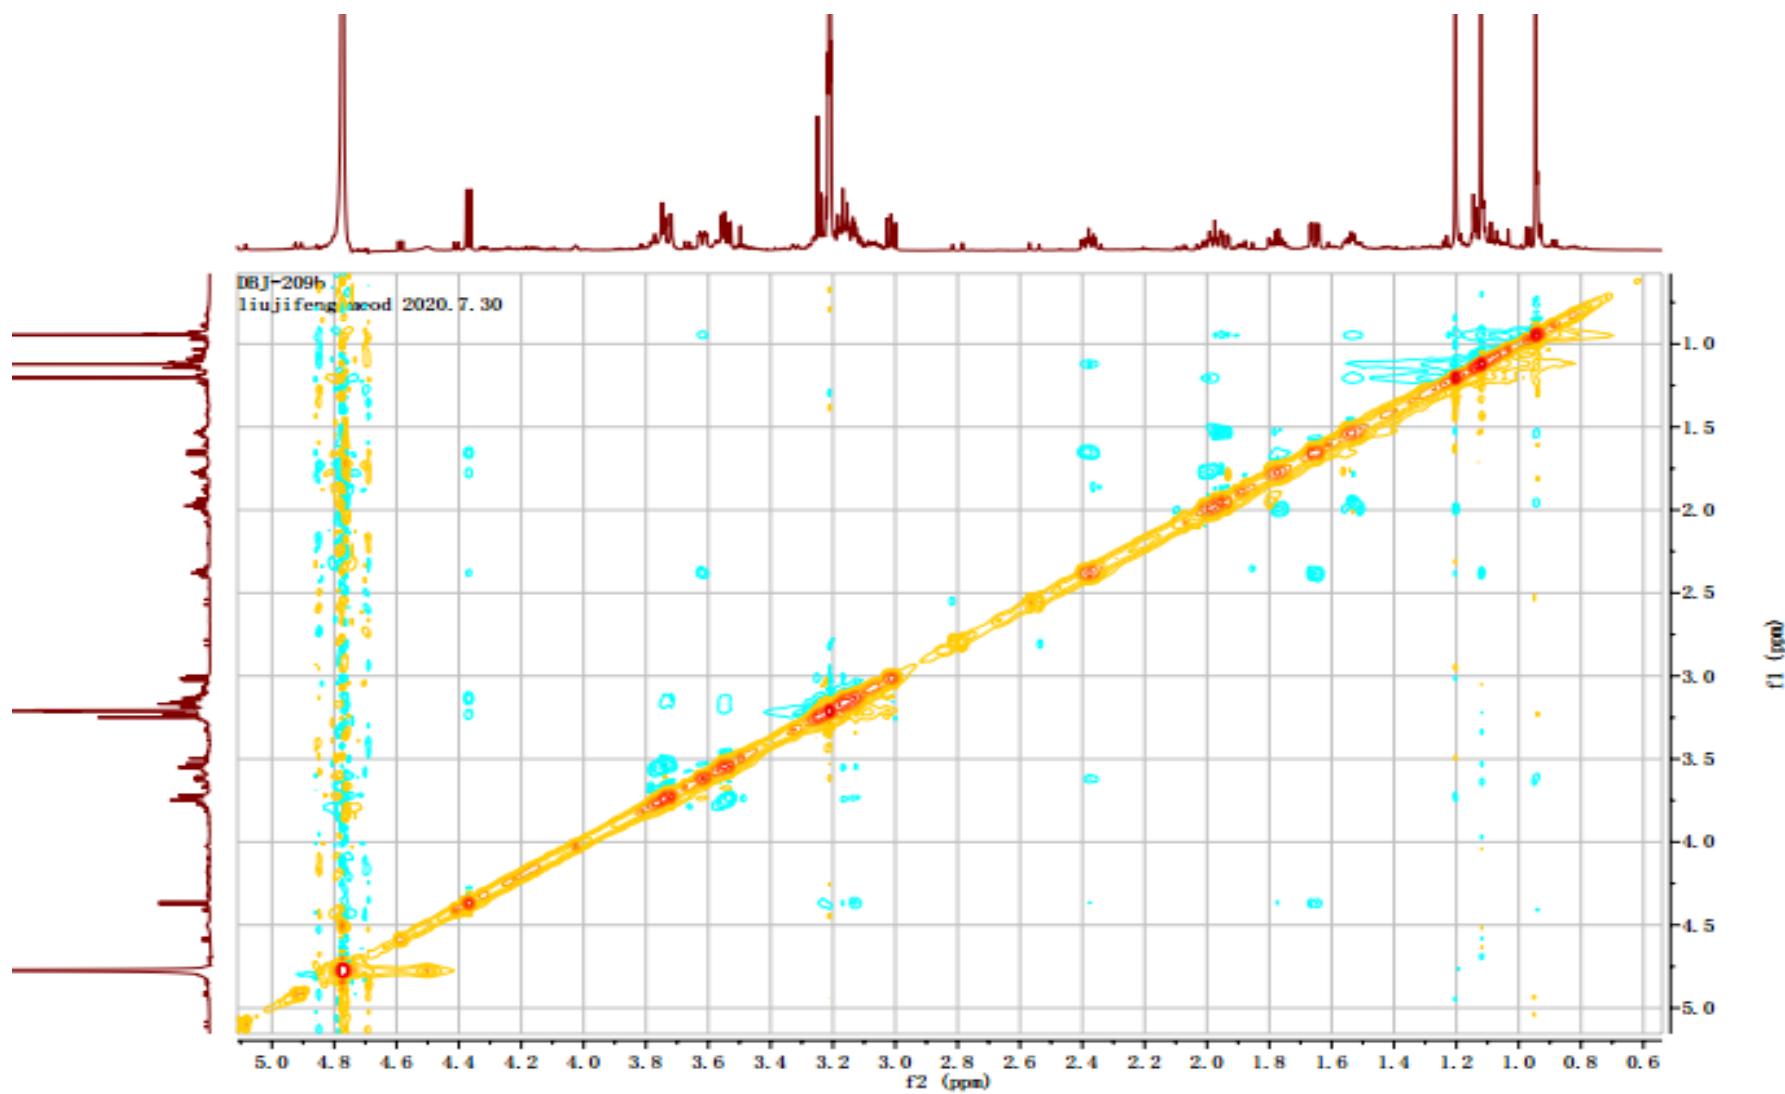

# The HRESI spectrum of compound 5

Formula Predictor Report - DBJ-209B\_19.tcd

Data File: D:\wendang\2020-10-06\NDJ-209B\_19.tcd

| Elmt | Val | Min | Max | Elmt | Val | Min | Max | Use Adduct |
|------|-----|-----|-----|------|-----|-----|-----|------------|
| H    | 1   | 0   | 300 | O    | 2   | 0   | 50  | H          |
| C    | 4   | 0   | 100 | S    | 2   | 0   | 0   | Na         |
| N    | 3   | 0   | 0   | Br   | 1   | 0   | 0   |            |

Error Margin (mDa): 20.0  
 DBE Range: 0.0 - 1000.0  
 Apply N Rule: yes  
 Use MSn Infor: no  
 Max Isotopes: all  
 Isotope Rf (%): 1.00  
 MSn Iso Rf (%): 75.00  
 MSn Logic Mode: AND  
 Max Results: 500

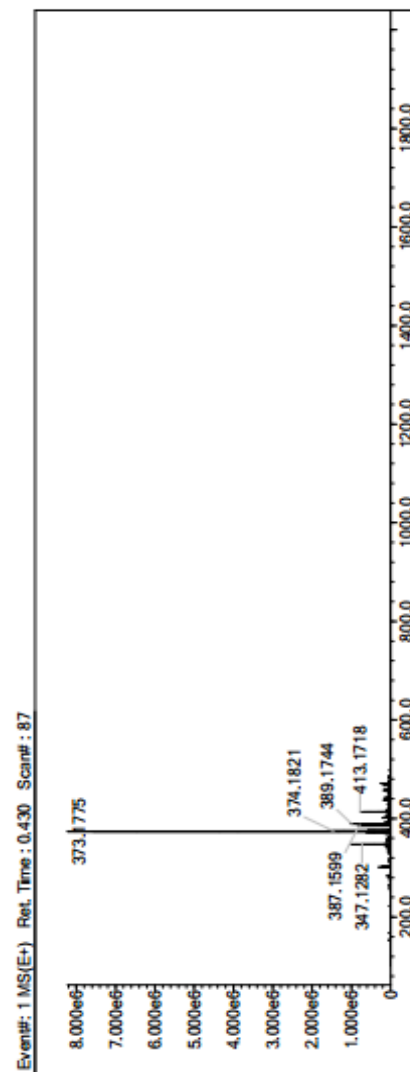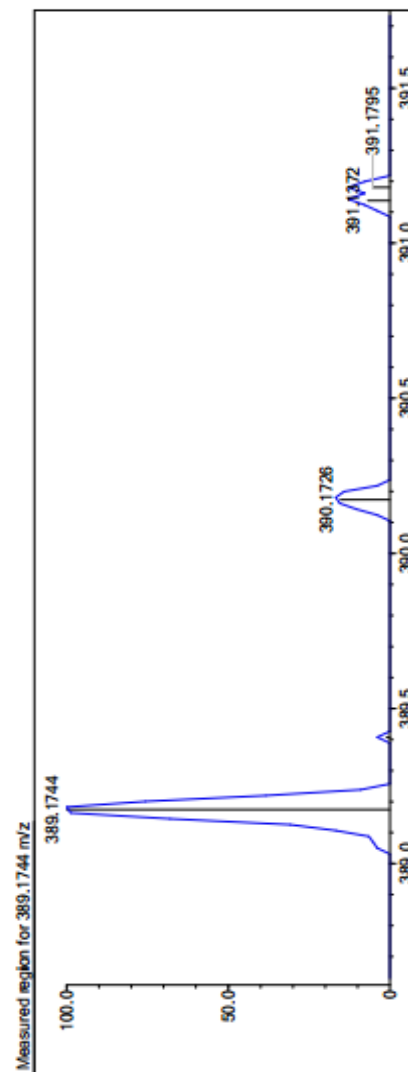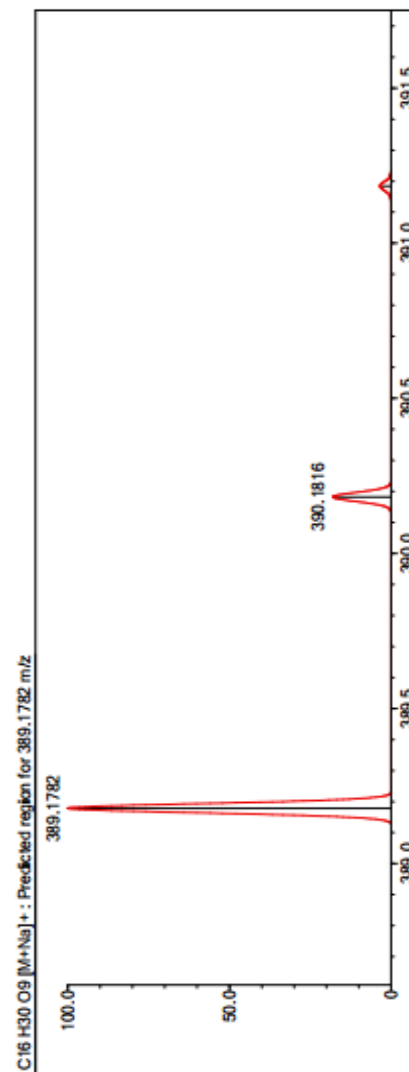

| Rank | Score | Formula (M) | Ion     | Mass. m/z | Pred. m/z | Df. (mDa) | Df. (ppm) | Iso   | DBE |
|------|-------|-------------|---------|-----------|-----------|-----------|-----------|-------|-----|
| 3    | 21.69 | C16 H30 O9  | [M+Na]+ | 389.1744  | 389.1782  | -3.8      | -9.76     | 51.15 | 2.0 |

The IR (KBr) spectrum of compound 5

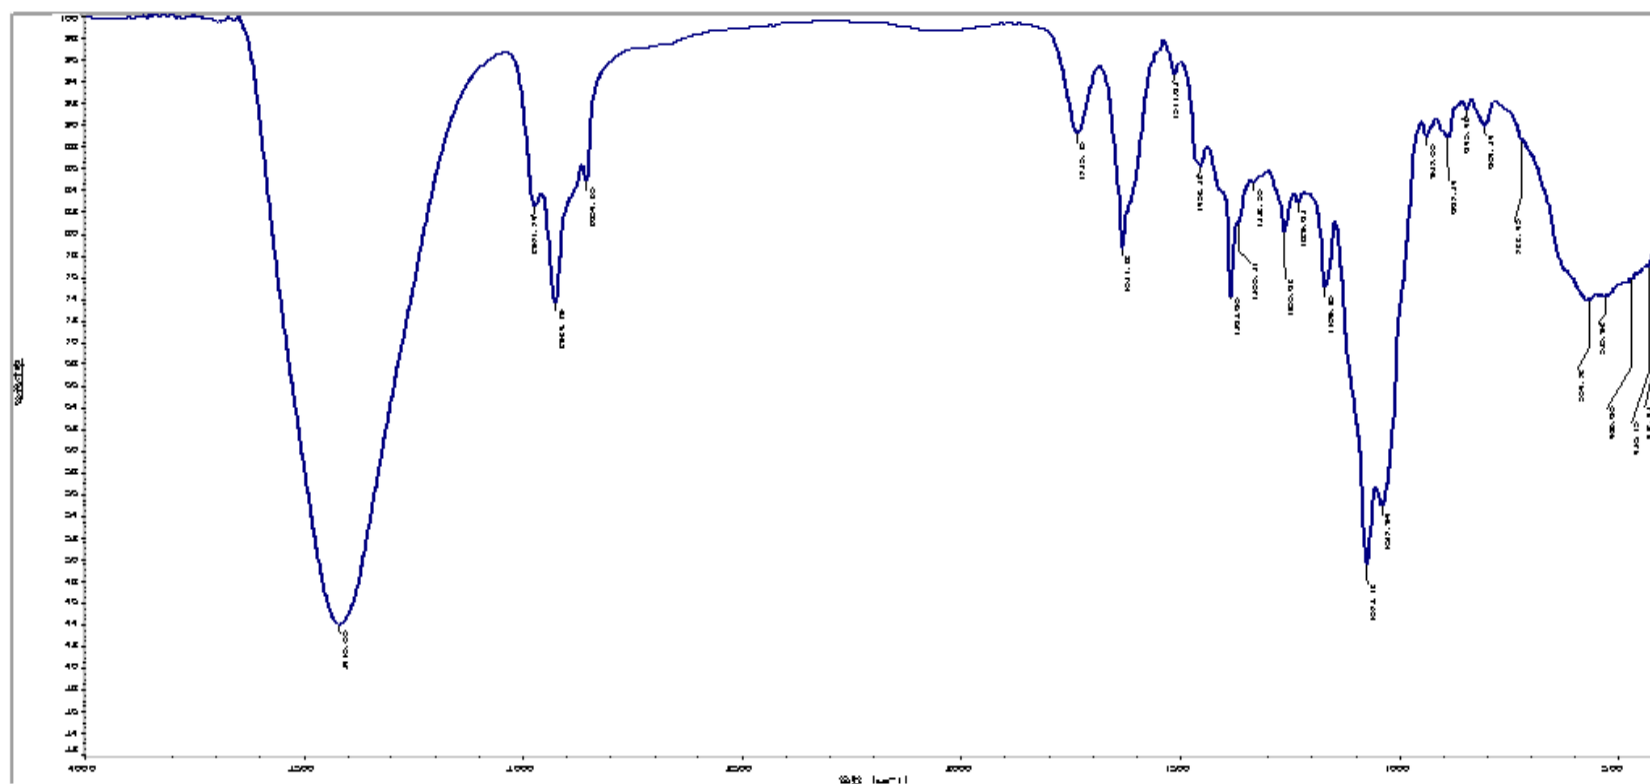

Sample Name: DBJ-209B

KBr压片

采集时间: 星期四 10月 22 16:24:04 2020 (GMT+08:00)(Measured on)

仪器型号: NICOLET iS10 (Instrument)

Software version: OMNIC 9.8.372

(Sample scan) 样品扫描次数: 16

背景扫描次数: 16

(Resolution) 分辨率: 4.000

采样增益: 1.0

动镜速度: 0.4747

(Acquisition) 光阑: 80.00

# The UV spectrum of compound 5

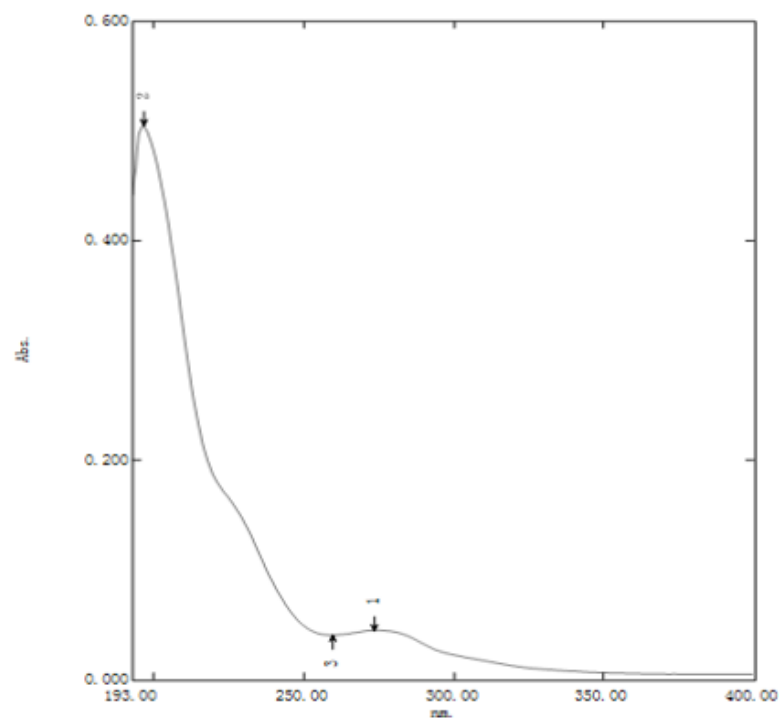

【测定属性】  
 波长范围 (nm): 190.00 到 600.00  
 扫描速度: 中速  
 采样间隔: 0.5  
 自动采样间隔: 停用  
 扫描模式: 单个

【仪器属性】  
 仪器类型: UV-2700 系列  
 测定方式: 吸收值  
 狭缝宽: 5.0 nm  
 积分时间: 0.1 秒  
 光源转换波长: 323.0 nm  
 检测器单元: 直接  
 S/R 转换: 标准  
 阶梯校正: OFF

【附件属性】  
 附件: 无

【数据处理参数】  
 阈值: 0.0010000  
 点: 4  
 内插: 停用  
 平均: 停用

【样品准备属性】

重量:  
 体积:  
 稀释:  
 光程长: 10mm  
 附加信息: 样品浓度: 0.0432毫克/毫升  
 溶剂: 甲醇

Wavelength Range: 190-600  
 Scan Speed: Medium  
 Sampling Interval: 0.5  
 Auto Sampling Interval: Enabled  
 Scan Mode: Auto

Instrument Properties  
 Instrument Type: UV-2700PC Series  
 Measuring Mode: Absorbance  
 Slit Width: 5.0 nm  
 Light Source Change Wavelength: 325.0 nm  
 S/R Exchange: Normal

Sample concentration: 0.0432 mg/mL  
 Solvent: MeOH

| Wavelength |     |         |       |    |
|------------|-----|---------|-------|----|
| No.        | P/V | 波长 (nm) | Abs.  | 描述 |
| 1          | ●   | 273.50  | 0.045 |    |
| 2          | ●   | 196.50  | 0.505 |    |
| 3          | ●   | 259.50  | 0.040 |    |

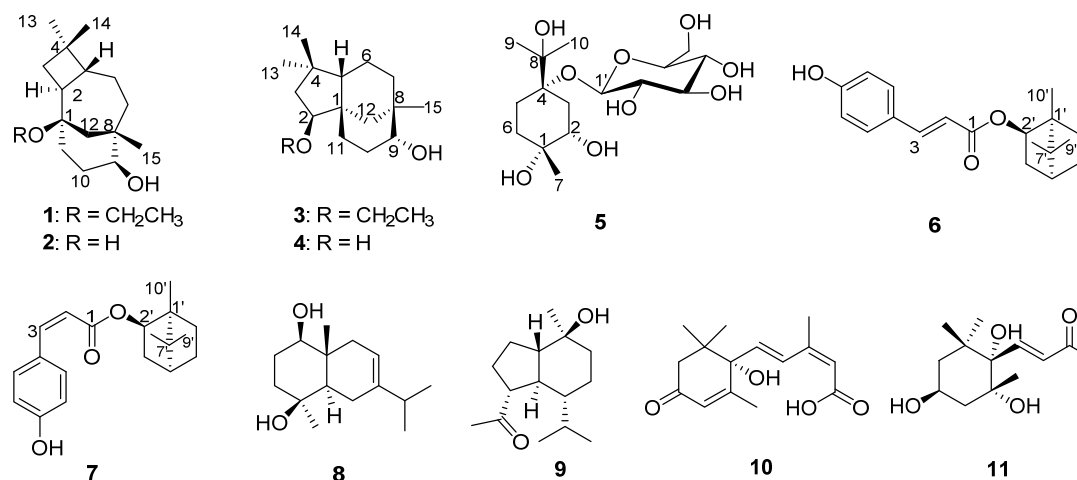

Fig.1. The structure of compounds 1-11

**Caryolane-1, 9 $\beta$ -diol (2):** White amorphous powder; <sup>1</sup>H-NMR (400 MHz, CDCl<sub>3</sub>)  $\delta$ : 3.43 (1H, t,  $J$  = 4.0 Hz, H-9), 2.22 (1H, m, H-2), 2.04 (1H, m, H-10a), 1.88 (1H, m, H-5), 1.76 (1H, m, H-10b), 1.63 (1H, m, H-11a), 1.55 (1H, m, H-3a), 1.52 (1H, m, H-6a), 1.50 (1H, m, H-11b), 1.45 (1H, m, H-3b), 1.40 (3H, m, H-12, H-7a), 1.38 (1H, H-6b), 1.15 (1H, m, H-7b), 1.01 (3H, s, H-14), 1.00 (3H, s, H-13), 0.92 (3H, s, H-15); <sup>13</sup>C-NMR (100 MHz, CDCl<sub>3</sub>)  $\delta$ : 70.7 (s, C-1), 38.0 (d, C-2), 34.0 (t, C-3), 35.1 (s, C-4), 43.9 (d, C-5), 20.4 (t, C-6), 35.4 (t, C-7), 39.3 (s, C-8), 72.3 (d, C-9), 28.2 (t, C-10), 33.4 (t, C-11), 42.4 (t, C-12), 20.8 (q, C-13), 30.5 (q, C-14), 26.6 (q, C-15); EI-MS  $m/z$ : 337 ([M-H]<sup>+</sup>, 5), 286 (10), 150 (100), 149 (50), 69 (100)。

**Clovane-2 $\alpha$ ,9 $\beta$ -diol (4):** White amorphous powder; <sup>1</sup>H-NMR (400 MHz, CDCl<sub>3</sub>)  $\delta$ : 3.80 (1H, dd,  $J$  = 5.6, 10.4 Hz, H-2), 3.33 (1H, br s, H-9), 1.99 (1H, m, H-10a), 1.72 (2H, m, H-11a, H-3a), 1.66 (1H, m, H-10b), 1.55 (1H, m, H-12a), 1.42 (3H, m, H-6a, H-7a, H-5), 1.31 (1H, m, H-6b), 1.12 (1H, m, H-11b), 1.09 (1H, m, H-3b), 1.04 (3H, s, H-14), 0.97 (3H, s, H-15), 0.93 (1H, m, H-12b), 0.86 (3H, s, H-13); <sup>13</sup>C-NMR (100 MHz, CDCl<sub>3</sub>)  $\delta$ : 44.1 (s, C-1), 80.8 (d, C-2), 47.3 (t, C-3), 37.1 (s, C-4), 50.5 (d, C-5), 20.6 (t, C-6), 33.0 (t, C-7), 34.7 (s,

C-8), 75.2 (d, C-9), 26.3 (t, C-10), 26.7 (t, C-11), 35.5 (t, C-12), 25.4 (q, C-13), 31.4 (q, C-14), 28.4 (q, C-15)。

(-)-Bornyl p-coumarate (**6**): White amorphous powder;  $^1\text{H-NMR}$  (600 MHz,  $\text{CD}_3\text{OD}$ )  $\delta$ : 7.62 (1H, d,  $J = 15.9$  Hz, H-2), 7.49 (2H, d,  $J = 8.6$  Hz, H-5, H-9), 6.82 (2H, d,  $J = 8.6$  Hz, H-6, H-8), 6.36 (1H, d,  $J = 15.9$  Hz, H-3), 5.01 (1H, m H-2'), 2.43 (1H, m, H-3'b), 2.11 (1H, m, H-6'b), 1.84 (1H, m, H-5'b), 1.72 (1H, t,  $J = 4.5$  Hz, H-4'), 1.42 (1H, m, H-6'a), 1.33 (1H, m, H-5'a), 1.06 (1H, dd,  $J = 13.7, 3.6$  Hz, H-3'a), 0.99 (3H, s, 9'-CH<sub>3</sub>), 0.95 (3H, s, 8'-CH<sub>3</sub>), 0.91 (3H, s, 10'-CH<sub>3</sub>);  $^{13}\text{C-NMR}$  (150 MHz,  $\text{CD}_3\text{OD}$ )  $\delta$ : 168.3 (s, C-1), 159.9 (s, C-7), 144.9 (d, C-3), 129.8 (d, C-5, C-9), 125.8 (s, C-4), 115.4 (d, C-2), 114.1 (d, C-6, C-8), 79.7 (d, C-2'), 48.5 (s, C-1'), 47.5 (s, C-7'), 44.9 (d, C-4'), 36.5 (t, C-3'), 27.6 (t, C-5'), 26.8 (t, C-6'), 18.7 (q, C-8'), 17.8 (q, C-9'), 12.5 (q, C-10')。

(-)-Bornyl cis-4-hydroxycinnamate (**7**): White amorphous powder;  $^1\text{H-NMR}$  (600 MHz,  $\text{CD}_3\text{OD}$ )  $\delta$ : 7.58 (2H, d,  $J = 8.6$  Hz, H-5, H-9), 6.89 (1H, d,  $J = 12.7$  Hz, H-2), 6.76 (2H, d,  $J = 8.7$  Hz, H-6, H-8), 5.81 (1H, d,  $J = 12.7$  Hz, H-3), 4.94 (1H, m, H-2'), 2.41 (1H, m, H-3'b), 1.86 (1H, m, H-6'b), 1.77 (1H, m, H-5'b), 1.69 (1H, t,  $J = 4.5$  Hz, H-4'), 1.04 (1H, dd,  $J = 13.7, 3.6$  Hz, H-3'a), 1.29 (1H, m, H-6'a), 1.22 (1H, m, H-5'a), 0.96 (3H, s, 9'-CH<sub>3</sub>), 0.92 (3H, s, 8'-CH<sub>3</sub>), 0.82 (3H, s, 10'-CH<sub>3</sub>);  $^{13}\text{C-NMR}$  (150 MHz,  $\text{CD}_3\text{OD}$ )  $\delta$ : 167.6 (s, C-1), 158.5 (s, C-7), 143.0 (d, C-3), 131.9 (d, C-5, C-9), 126.4 (s, C-4), 116.1 (d, C-2), 114.5 (d, C-6, C-8), 79.8 (d, C-2'), 48.3 (s, C-1'), 47.6 (s, C-7'), 44.9 (d, C-4'), 36.3 (t, C-3'), 27.5 (t, C-5'), 26.7 (t, C-6'), 18.7 (q, C-8'), 17.8 (q, C-9'), 12.5 (q, C-10')。

**Oplodiol (8)**: White amorphous powder;  $^1\text{H-NMR}$  (500 MHz,  $\text{CDCl}_3$ )  $\delta$ : 5.63 (1H, d,  $J = 5.0$  Hz, H-8), 3.32 (1H, dd,  $J = 11.5, 4.0$  Hz, H-1), 2.22 (1H, m, H-11), 2.09 (1H, m, H-2a), 2.06 (2H, m, H-6), 1.89 (1H, m, H-9a), 1.86 (1H, m, H-2b), 1.76 (1H, m, H-3a), 1.63 (1H, m, H-9b), 1.59 (1H, m, H-3b), 1.32 (1H, m, H-5), 1.20 (3H, s, H-15), 1.05 (3H, d,  $J = 6.5$  Hz, H-12), 1.04 (3H, d,  $J = 6.5$  Hz, H-13), 0.98 (3H, s, H-14);  $^{13}\text{C-NMR}$  (125 MHz,  $\text{CDCl}_3$ )  $\delta$ : 79.7 (d, C-1), 40.7 (t, C-2), 39.4 (t, C-3), 71.0 (s, C-4), 46.2 (d, C-5), 23.0 (t, C-6), 141.9 (s, C-7), 116.1 (d, C-8), 26.9 (t, C-9), 37.7 (s, C-10), 35.0 (d, C-11), 21.8 (q, C-12), 21.2 (q, C-13), 11.7 (q, C-14), 19.8 (q, C-15)。

**Ent-oplopanone (9)**: White amorphous powder;  $^1\text{H-NMR}$  (400 MHz,  $\text{CDCl}_3$ )  $\delta$ : 2.64 (1H, m, H-4), 2.19 (3H, s, H-14), 1.20 (3H, s,

H-15), 0.89 (3H, d,  $J = 6.7$  Hz, H-11), 0.68 (3H, d,  $J = 6.7$  Hz, H-12);  $^{13}\text{C}$ -NMR (100 MHz,  $\text{CDCl}_3$ )  $\delta$ : 46.7 (d, C-1), 42.0 (t, C-2), 28.6 (t, C-3), 57.0 (d, C-4), 211.5 (s, C-5), 55.7 (d, C-6), 49.4 (d, C-7), 25.3 (t, C-8), 23.0 (t, C-9), 73.0 (s, C-10), 29.5 (d, C-11), 15.6 (q, C-12), 22.0 (q, C-13), 20.3 (q, C-14), 29.5 (q, C-15).

**Abscisic acid (10):** White amorphous powder;  $^1\text{H}$ -NMR (600 MHz,  $\text{CD}_3\text{OD}$ )  $\delta$ : 7.77 (1H, d,  $J = 16.1$  Hz, H-4), 6.24 (1H, d,  $J = 16.1$  Hz, H-5), 5.92 (1H, s, H-3'), 5.74 (1H, s, H-2), 2.53 (1H, d,  $J = 17.0$  Hz, H-5'a), 2.18 (1H, d,  $J = 17.0$ , H-5'b), 2.04 (3H, s, H-6), 1.93 (3H, s, H-7'), 1.06 (3H, s, H-8'), 1.03 (3H, s, H-9');  $^{13}\text{C}$ -NMR (150 MHz,  $\text{CD}_3\text{OD}$ )  $\delta$ : 168.0 (s, C-1), 126.2 (d, C-2), 149.7 (s, C-3), 128.0 (d, C-4), 136.6 (d, C-5), 20.0 (q, C-6), 79.2 (s, C-1'), 165.1 (s, C-2'), 118.2 (d, C-3'), 199.8 (s, C-4'), 49.3 (t, C-5'), 41.5 (s, C-6'), 18.3 (q, C-7'), 22.2 (q, C-8'), 23.3 (q, C-9').

**(3S,5R,6S,7E)-3,5,6-trihydroxy-7-megastigmen-9-one (11):** White amorphous powder;  $^1\text{H}$ -NMR (400 MHz,  $\text{CD}_3\text{OD}$ )  $\delta$ : 7.17 (1H, d,  $J = 15.8$  Hz, H-8), 6.17 (1H, d,  $J = 15.7$  Hz, H-8), 3.76 (1H, m, H-3), 2.40-2.57 (1H, m, H-4a), 2.29 (3H, s, H-10), 1.64-1.68 (1H, m, H-4b), 1.55-1.59 (1H, m, H-2a), 1.23-1.27 (1H, m, H-2b), 1.19 (3H, s, H-12), 1.18 (3H, s, H-13), 0.95 (3H, s, H-11);  $^{13}\text{C}$ -NMR (100 MHz,  $\text{CDCl}_3$ )  $\delta$ :  $^{13}\text{C}$ -NMR (100 MHz,  $\text{CD}_3\text{OD}$ )  $\delta$ : 34.7 (s, C-1), 46.3 (t, C-2), 63.0 (d, C-3), 39.9 (t, C-4), 67.4 (s, C-5), 69.5 (d, C-6), 144.0 (d, C-7), 132.4 (d, C-8), 198.8 (s, C-9), 26.0 (q, C-10), 23.8 (q, C-11), 128.4 (q, C-12), 8.7 (q, C-13).

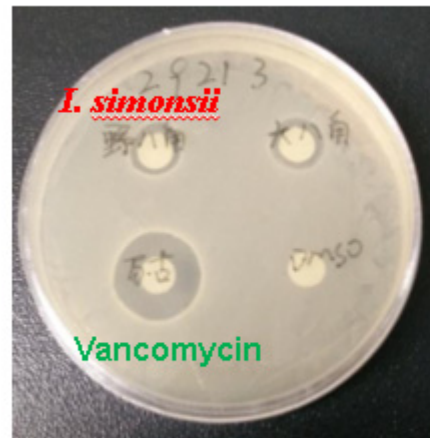

*S. aureus* ATCC29213

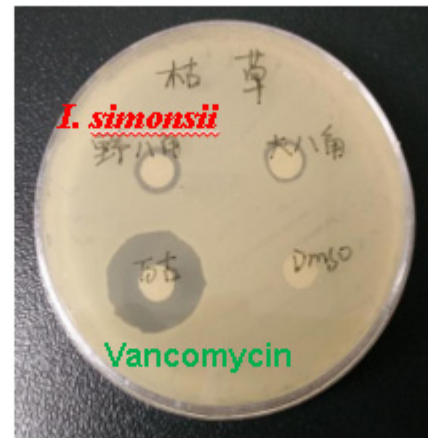

*B. subtilis* ATCC6633

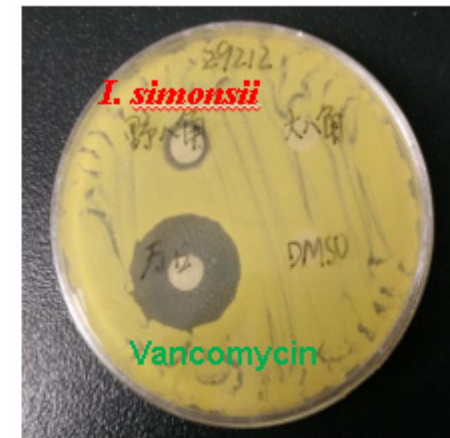

*E. faecalis* ATCC29212
